# Supplementary material
Source: publisher figshare collection journal article supplement (https://karger.figshare.com/articles/dataset/_/20072159)

## CC patients

| NO | Age (years) | Expression |            |       | Group           | Cervical cancer         | Stage         | Survival state | Survival time |
|----|-------------|------------|------------|-------|-----------------|-------------------------|---------------|----------------|---------------|
|    |             | BCYRN1     | miR-330-5p | HMGB3 |                 |                         |               |                |               |
| 1  | 56          | 1.48       | 0.67       | 1.65  | High expression | squamous cell carcinoma | FIGO stage II | death          | 33            |
| 2  | 46          | 1.27       | 0.49       | 0.88  | High expression | squamous cell carcinoma | FIGO stage II | alive          | 60            |
| 3  | 53          | 1.11       | 0.74       | 0.97  | Low expression  | squamous cell carcinoma | FIGO stage I  | death          | 12            |
| 4  | 39          | 0.59       | 1.10       | 0.93  | Low expression  | adenocarcinoma          | FIGO stage I  | alive          | 60            |
| 5  | 50          | 1.27       | 0.59       | 1.58  | High expression | squamous cell carcinoma | FIGO stage I  | alive          | 60            |
| 6  | 44          | 1.11       | 1.16       | 1.65  | Low expression  | adenocarcinoma          | FIGO stage I  | alive          | 21            |
| 7  | 45          | 1.92       | 0.41       | 1.78  | High expression | squamous cell carcinoma | FIGO stage II | death          | 6             |
| 8  | 46          | 1.01       | 1.08       | 1.34  | Low expression  | adenocarcinoma          | FIGO stage II | death          | 42            |
| 9  | 58          | 0.62       | 1.27       | 1.56  | Low expression  | adenocarcinoma          | FIGO stage I  | alive          | 60            |
| 10 | 40          | 1.16       | 1.23       | 1.54  | Low expression  | adenocarcinoma          | FIGO stage II | death          | 9             |
| 11 | 58          | 1.39       | 0.64       | 1.34  | High expression | adenocarcinoma          | FIGO stage I  | alive          | 60            |
| 12 | 65          | 1.02       | 1.04       | 0.91  | Low expression  | squamous cell carcinoma | FIGO stage I  | death          | 12            |
| 13 | 51          | 1.64       | 0.78       | 1.16  | High expression | adenocarcinoma          | FIGO stage I  | death          | 48            |
| 14 | 46          | 1.23       | 1.30       | 0.82  | High expression | squamous cell carcinoma | FIGO stage II | alive          | 60            |
| 15 | 50          | 1.71       | 0.64       | 1.38  | High expression | adenocarcinoma          | FIGO stage I  | death          | 18            |
| 16 | 50          | 1.12       | 1.16       | 0.81  | Low expression  | squamous cell carcinoma | FIGO stage II | death          | 15            |
| 17 | 57          | 1.48       | 0.53       | 0.95  | High expression | squamous cell carcinoma | FIGO stage I  | death          | 21            |
| 18 | 53          | 1.27       | 1.05       | 0.78  | High expression | adenocarcinoma          | FIGO stage I  | alive          | 60            |
| 19 | 51          | 0.74       | 0.49       | 1.20  | Low expression  | squamous cell carcinoma | FIGO stage I  | death          | 60            |
| 20 | 43          | 1.22       | 1.24       | 0.65  | Low expression  | squamous cell carcinoma | FIGO stage II | death          | 3             |
| 21 | 41          | 1.14       | 1.25       | 0.76  | Low expression  | adenocarcinoma          | FIGO stage I  | death          | 6             |
| 22 | 59          | 1.26       | 1.14       | 0.96  | High expression | adenocarcinoma          | FIGO stage II | alive          | 60            |
| 23 | 55          | 0.53       | 1.36       | 0.63  | Low expression  | squamous cell carcinoma | FIGO stage II | alive          | 60            |
| 24 | 39          | 1.72       | 0.67       | 1.69  | High expression | adenocarcinoma          | FIGO stage I  | death          | 15            |
| 25 | 37          | 0.83       | 0.65       | 0.80  | Low expression  | squamous cell carcinoma | FIGO stage I  | death          | 6             |
| 26 | 55          | 1.00       | 0.99       | 0.68  | Low expression  | adenocarcinoma          | FIGO stage II | death          | 45            |
| 27 | 50          | 0.97       | 1.21       | 0.84  | Low expression  | squamous cell carcinoma | FIGO stage I  | death          | 57            |
| 28 | 52          | 0.92       | 1.08       | 0.70  | Low expression  | squamous cell carcinoma | FIGO stage II | death          | 27            |
| 29 | 61          | 1.24       | 0.76       | 1.59  | High expression | adenocarcinoma          | FIGO stage I  | alive          | 60            |
| 30 | 47          | 0.80       | 0.99       | 1.01  | Low expression  | squamous cell carcinoma | FIGO stage I  | death          | 48            |
| 31 | 59          | 1.21       | 1.07       | 1.05  | Low expression  | adenocarcinoma          | FIGO stage II | death          | 6             |
| 32 | 39          | 1.01       | 0.96       | 0.88  | Low expression  | squamous cell carcinoma | FIGO stage I  | death          | 12            |
| 33 | 45          | 1.43       | 0.97       | 0.71  | High expression | adenocarcinoma          | FIGO stage II | death          | 60            |
| 34 | 53          | 0.72       | 1.03       | 0.81  | Low expression  | adenocarcinoma          | FIGO stage I  | alive          | 60            |
| 35 | 67          | 1.38       | 0.61       | 0.88  | High expression | squamous cell carcinoma | FIGO stage II | alive          | 60            |
| 36 | 53          | 0.69       | 0.86       | 0.76  | Low expression  | squamous cell carcinoma | FIGO stage II | alive          | 60            |
| 37 | 59          | 0.95       | 0.96       | 1.45  | Low expression  | adenocarcinoma          | FIGO stage I  | alive          | 21            |
| 38 | 64          | 0.90       | 1.29       | 1.67  | Low expression  | squamous cell carcinoma | FIGO stage I  | death          | 9             |
| 39 | 37          | 1.09       | 1.02       | 1.26  | Low expression  | adenocarcinoma          | FIGO stage II | death          | 24            |
| 40 | 51          | 1.55       | 0.62       | 0.90  | High expression | adenocarcinoma          | FIGO stage II | death          | 51            |
| 41 | 46          | 0.77       | 0.49       | 0.77  | Low expression  | squamous cell carcinoma | FIGO stage I  | death          | 60            |
| 42 | 47          | 0.97       | 0.95       | 0.98  | Low expression  | adenocarcinoma          | FIGO stage I  | death          | 9             |
| 43 | 61          | 0.99       | 1.29       | 1.51  | Low expression  | squamous cell carcinoma | FIGO stage I  | death          | 15            |
| 44 | 55          | 1.45       | 0.52       | 1.16  | High expression | adenocarcinoma          | FIGO stage II | alive          | 54            |
| 45 | 58          | 1.03       | 0.84       | 0.98  | Low expression  | adenocarcinoma          | FIGO stage I  | death          | 33            |
| 46 | 65          | 1.41       | 0.81       | 1.37  | High expression | squamous cell carcinoma | FIGO stage I  | alive          | 60            |
| 47 | 67          | 1.52       | 0.69       | 1.25  | High expression | adenocarcinoma          | FIGO stage II | death          | 21            |
| 48 | 43          | 1.26       | 0.97       | 1.48  | High expression | squamous cell carcinoma | FIGO stage I  | alive          | 60            |
| 49 | 36          | 0.59       | 1.35       | 0.65  | Low expression  | squamous cell carcinoma | FIGO stage I  | alive          | 60            |
| 50 | 56          | 1.23       | 0.85       | 1.02  | High expression | squamous cell carcinoma | FIGO stage I  | alive          | 60            |
| 51 | 41          | 1.52       | 0.68       | 1.64  | High expression | adenocarcinoma          | FIGO stage II | death          | 33            |
| 52 | 55          | 1.80       | 0.44       | 1.71  | High expression | squamous cell carcinoma | FIGO stage I  | alive          | 12            |
| 53 | 44          | 1.00       | 0.80       | 1.18  | Low expression  | adenocarcinoma          | FIGO stage II | alive          | 12            |
| 54 | 46          | 1.69       | 0.76       | 1.46  | High expression | squamous cell carcinoma | FIGO stage I  | death          | 27            |
| 55 | 42          | 1.67       | 0.52       | 1.45  | High expression | squamous cell carcinoma | FIGO stage II | death          | 42            |
| 56 | 46          | 1.65       | 0.81       | 1.68  | High expression | adenocarcinoma          | FIGO stage I  | death          | 45            |
| 57 | 48          | 1.23       | 0.59       | 1.37  | High expression | adenocarcinoma          | FIGO stage II | alive          | 60            |
| 58 | 52          | 1.27       | 0.73       | 1.27  | High expression | squamous cell carcinoma | FIGO stage II | alive          | 60            |
| 59 | 44          | 1.30       | 1.31       | 1.55  | High expression | squamous cell carcinoma | FIGO stage I  | alive          | 60            |
| 60 | 49          | 1.68       | 0.68       | 1.66  | High expression | adenocarcinoma          | FIGO stage II | death          | 33            |
| 61 | 52          | 1.14       | 1.15       | 1.55  | Low expression  | squamous cell carcinoma | FIGO stage II | death          | 15            |
| 62 | 59          | 1.61       | 0.53       | 1.01  | High expression | squamous cell carcinoma | FIGO stage I  | death          | 57            |

Fig. 1

Fig. 1. BCYRN1 is overexpressed in CC, and it is responsible for poor prognosis and DDP-resistance of CC patients.

A, the relation between BCYRN1 and CC predicted by Incrnadisease database.

| LncRNA name | Disease name    | Dysfunction type | Description                                                                                                                                       | Chr  | Start    | End      | Strand | Species | Alias                                | Genbank   | Sequence | Reference |
|-------------|-----------------|------------------|---------------------------------------------------------------------------------------------------------------------------------------------------|------|----------|----------|--------|---------|--------------------------------------|-----------|----------|-----------|
| BCYRN1      | cervical cancer | Expression       | BC200 RNA was expressed in carcinomas of the breast, cervix, oesophagus, lung, ovary, parotid and tongue, but not in corresponding normal tissues | chr2 | 47335315 | 47335314 | +      | Human   | BC200; BC200a; LINC00004; NCRNA00004 | NR_001568 | GeneRNA  | 9422992   |

B, BCYRN1 expression in 62 pairs of CC and paracancerous tissues verified via RT-qPCR.

| qRT-PCR data of BCYRN1 (GAPDH as internal reference) |         |           |        |        |        |                     |
|------------------------------------------------------|---------|-----------|--------|--------|--------|---------------------|
| Sample                                               | NO.     | Ct values |        | ΔCt    | ΔΔCt   | relative expression |
|                                                      |         | GAPDH     | BCYRN1 | BCYRN1 | BCYRN1 | BCYRN1              |
| para-carcinoma tissue                                | 1       | 17.12     | 21.36  | 4.24   | -0.03  | 1.02                |
|                                                      | 2       | 18.23     | 21.97  | 3.74   | -0.53  | 1.45                |
|                                                      | 3       | 18.43     | 22.54  | 4.11   | -0.16  | 1.12                |
|                                                      | 4       | 17.99     | 22.56  | 4.57   | 0.30   | 0.81                |
|                                                      | 5       | 17.99     | 22.15  | 4.16   | -0.11  | 1.08                |
|                                                      | 6       | 18.10     | 22.02  | 3.92   | -0.36  | 1.28                |
|                                                      | 7       | 18.66     | 22.57  | 3.91   | -0.36  | 1.28                |
|                                                      | 8       | 18.42     | 22.13  | 3.71   | -0.56  | 1.48                |
|                                                      | 9       | 17.87     | 22.78  | 4.91   | 0.64   | 0.64                |
|                                                      | 10      | 18.67     | 22.56  | 3.89   | -0.38  | 1.30                |
|                                                      | 11      | 17.78     | 21.89  | 4.11   | -0.16  | 1.12                |
|                                                      | 12      | 18.67     | 23.23  | 4.56   | 0.29   | 0.82                |
|                                                      | 13      | 17.66     | 21.78  | 4.12   | -0.15  | 1.11                |
|                                                      | 14      | 18.66     | 22.86  | 4.20   | -0.07  | 1.05                |
|                                                      | 15      | 18.43     | 23.32  | 4.89   | 0.62   | 0.65                |
|                                                      | 16      | 17.44     | 22.45  | 5.01   | 0.74   | 0.60                |
|                                                      | 17      | 18.44     | 22.42  | 3.98   | -0.29  | 1.22                |
|                                                      | 18      | 18.40     | 22.84  | 4.44   | 0.17   | 0.89                |
|                                                      | 19      | 18.54     | 22.67  | 4.13   | -0.14  | 1.10                |
|                                                      | 20      | 17.76     | 21.77  | 4.01   | -0.26  | 1.20                |
|                                                      | 21      | 17.54     | 22.16  | 4.62   | 0.35   | 0.79                |
|                                                      | 22      | 18.56     | 23.13  | 4.57   | 0.30   | 0.81                |
|                                                      | 23      | 18.42     | 22.56  | 4.14   | -0.13  | 1.10                |
|                                                      | 24      | 17.78     | 21.78  | 4.00   | -0.27  | 1.21                |
|                                                      | 25      | 16.80     | 21.59  | 4.79   | 0.52   | 0.70                |
|                                                      | 26      | 16.90     | 20.76  | 3.86   | -0.41  | 1.33                |
|                                                      | 27      | 18.67     | 22.76  | 4.09   | -0.18  | 1.13                |
|                                                      | 28      | 18.66     | 23.16  | 4.50   | 0.23   | 0.85                |
|                                                      | 29      | 18.65     | 23.24  | 4.59   | 0.32   | 0.80                |
|                                                      | 30      | 17.55     | 22.36  | 4.81   | 0.54   | 0.69                |
|                                                      | 31      | 16.78     | 20.78  | 4.00   | -0.27  | 1.21                |
|                                                      | 32      | 18.54     | 22.69  | 4.15   | -0.12  | 1.09                |
|                                                      | 33      | 18.54     | 22.46  | 3.92   | -0.35  | 1.28                |
|                                                      | 34      | 18.56     | 23.36  | 4.80   | 0.53   | 0.69                |
|                                                      | 35      | 17.56     | 21.67  | 4.11   | -0.16  | 1.12                |
|                                                      | 36      | 18.65     | 22.91  | 4.26   | -0.01  | 1.01                |
|                                                      | 37      | 17.78     | 21.78  | 4.00   | -0.27  | 1.21                |
|                                                      | 38      | 18.65     | 22.67  | 4.02   | -0.25  | 1.19                |
|                                                      | 39      | 18.65     | 23.36  | 4.71   | 0.44   | 0.74                |
|                                                      | 40      | 18.56     | 22.56  | 4.00   | -0.27  | 1.21                |
|                                                      | 41      | 17.56     | 21.45  | 3.89   | -0.38  | 1.30                |
|                                                      | 42      | 18.54     | 23.41  | 4.87   | 0.60   | 0.66                |
|                                                      | 43      | 18.43     | 22.36  | 3.93   | -0.34  | 1.27                |
|                                                      | 44      | 18.56     | 22.65  | 4.09   | -0.18  | 1.13                |
|                                                      | 45      | 18.57     | 23.66  | 5.09   | 0.82   | 0.57                |
|                                                      | 46      | 18.56     | 22.56  | 4.01   | -0.27  | 1.20                |
|                                                      | 47      | 18.43     | 22.81  | 4.38   | 0.11   | 0.93                |
|                                                      | 48      | 17.11     | 21.11  | 4.00   | -0.27  | 1.21                |
|                                                      | 49      | 18.21     | 22.58  | 4.37   | 0.10   | 0.93                |
|                                                      | 50      | 17.67     | 21.56  | 3.89   | -0.38  | 1.30                |
|                                                      | 51      | 17.68     | 21.67  | 3.99   | -0.28  | 1.22                |
|                                                      | 52      | 18.32     | 22.64  | 4.32   | 0.05   | 0.97                |
|                                                      | 53      | 17.54     | 22.56  | 5.02   | 0.75   | 0.60                |
|                                                      | 54      | 18.12     | 22.00  | 3.88   | -0.39  | 1.31                |
|                                                      | 55      | 17.86     | 22.76  | 4.90   | 0.63   | 0.65                |
|                                                      | 56      | 18.65     | 22.54  | 3.89   | -0.38  | 1.30                |
|                                                      | 57      | 17.56     | 22.36  | 4.80   | 0.53   | 0.69                |
|                                                      | 58      | 18.65     | 22.67  | 4.02   | -0.25  | 1.19                |
|                                                      | 59      | 17.76     | 22.36  | 4.60   | 0.33   | 0.80                |
|                                                      | 60      | 17.88     | 21.92  | 4.04   | -0.23  | 1.17                |
|                                                      | 61      | 18.21     | 22.32  | 4.11   | -0.16  | 1.12                |
|                                                      | 62      | 18.24     | 22.43  | 4.19   | -0.08  | 1.06                |
|                                                      | AVERAGE | 18.12     | 22.39  | 4.27   | 0.00   | 1.03                |
|                                                      | STDEV   | 0.53      | 0.63   | 0.37   | 0.37   | 0.24                |
|                                                      | 1       | 17.64     | 21.32  | 3.68   | -0.56  | 1.48                |
|                                                      | 2       | 18.34     | 21.74  | 3.40   | -0.34  | 1.27                |
|                                                      | 3       | 18.27     | 22.23  | 3.96   | -0.15  | 1.11                |
|                                                      | 4       | 17.08     | 22.41  | 5.33   | 0.76   | 0.59                |
|                                                      | 5       | 17.11     | 20.93  | 3.82   | -0.34  | 1.27                |
|                                                      | 6       | 17.56     | 21.32  | 3.76   | -0.16  | 1.11                |

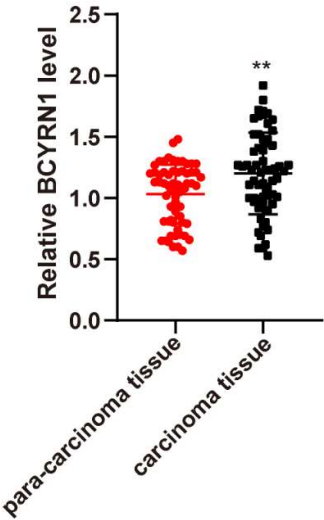

Fig. 1

|                  |         |       |       |      |       |      |
|------------------|---------|-------|-------|------|-------|------|
| carcinoma tissue | 7       | 18.22 | 21.19 | 2.97 | -0.94 | 1.92 |
|                  | 8       | 17.56 | 21.26 | 3.70 | -0.01 | 1.01 |
|                  | 9       | 16.78 | 22.38 | 5.60 | 0.69  | 0.62 |
|                  | 10      | 18.56 | 22.24 | 3.68 | -0.21 | 1.16 |
|                  | 11      | 18.67 | 22.30 | 3.63 | -0.48 | 1.39 |
|                  | 12      | 17.80 | 22.33 | 4.53 | -0.03 | 1.02 |
|                  | 13      | 17.87 | 21.28 | 3.41 | -0.71 | 1.64 |
|                  | 14      | 18.22 | 22.12 | 3.90 | -0.30 | 1.23 |
|                  | 15      | 18.44 | 22.56 | 4.12 | -0.77 | 1.71 |
|                  | 16      | 18.67 | 23.52 | 4.85 | -0.16 | 1.12 |
|                  | 17      | 18.67 | 22.08 | 3.41 | -0.57 | 1.48 |
|                  | 18      | 18.67 | 22.77 | 4.10 | -0.34 | 1.27 |
|                  | 19      | 17.65 | 22.21 | 4.56 | 0.43  | 0.74 |
|                  | 20      | 17.67 | 21.39 | 3.72 | -0.29 | 1.22 |
|                  | 21      | 18.11 | 22.54 | 4.43 | -0.19 | 1.14 |
|                  | 22      | 17.86 | 22.10 | 4.24 | -0.33 | 1.26 |
|                  | 23      | 18.20 | 23.26 | 5.06 | 0.92  | 0.53 |
|                  | 24      | 18.42 | 21.64 | 3.22 | -0.78 | 1.72 |
|                  | 25      | 17.56 | 22.62 | 5.06 | 0.27  | 0.83 |
|                  | 26      | 18.24 | 22.10 | 3.86 | 0.00  | 1.00 |
|                  | 27      | 17.56 | 21.69 | 4.13 | 0.04  | 0.97 |
|                  | 28      | 18.45 | 23.07 | 4.62 | 0.12  | 0.92 |
|                  | 29      | 18.50 | 22.78 | 4.28 | -0.31 | 1.24 |
|                  | 30      | 17.67 | 22.80 | 5.13 | 0.32  | 0.80 |
|                  | 31      | 18.56 | 22.28 | 3.72 | -0.28 | 1.21 |
|                  | 32      | 17.77 | 21.91 | 4.14 | -0.01 | 1.01 |
|                  | 33      | 17.88 | 21.28 | 3.40 | -0.52 | 1.43 |
|                  | 34      | 18.23 | 23.50 | 5.27 | 0.47  | 0.72 |
|                  | 35      | 18.56 | 22.21 | 3.65 | -0.46 | 1.38 |
|                  | 36      | 18.44 | 23.24 | 4.80 | 0.54  | 0.69 |
|                  | 37      | 18.56 | 22.63 | 4.07 | 0.07  | 0.95 |
|                  | 38      | 18.46 | 22.63 | 4.17 | 0.15  | 0.90 |
|                  | 39      | 17.56 | 22.15 | 4.59 | -0.12 | 1.09 |
|                  | 40      | 18.56 | 21.93 | 3.37 | -0.63 | 1.55 |
|                  | 41      | 18.21 | 22.48 | 4.27 | 0.38  | 0.77 |
|                  | 42      | 17.45 | 22.36 | 4.91 | 0.04  | 0.97 |
|                  | 43      | 17.56 | 21.50 | 3.94 | 0.01  | 0.99 |
|                  | 44      | 18.40 | 21.95 | 3.55 | -0.54 | 1.45 |
|                  | 45      | 18.45 | 23.50 | 5.05 | -0.04 | 1.03 |
|                  | 46      | 17.55 | 21.06 | 3.51 | -0.50 | 1.41 |
|                  | 47      | 18.45 | 22.23 | 3.78 | -0.60 | 1.52 |
|                  | 48      | 18.65 | 22.32 | 3.67 | -0.33 | 1.26 |
|                  | 49      | 17.45 | 22.58 | 5.13 | 0.76  | 0.59 |
|                  | 50      | 17.56 | 21.15 | 3.59 | -0.30 | 1.23 |
|                  | 51      | 18.40 | 21.79 | 3.39 | -0.60 | 1.52 |
|                  | 52      | 18.45 | 21.92 | 3.47 | -0.85 | 1.80 |
|                  | 53      | 17.55 | 22.57 | 5.02 | 0.00  | 1.00 |
|                  | 54      | 18.45 | 21.57 | 3.12 | -0.76 | 1.69 |
|                  | 55      | 18.26 | 22.42 | 4.16 | -0.74 | 1.67 |
|                  | 56      | 18.46 | 21.63 | 3.17 | -0.72 | 1.65 |
|                  | 57      | 18.56 | 23.06 | 4.50 | -0.30 | 1.23 |
|                  | 58      | 17.11 | 20.79 | 3.68 | -0.34 | 1.27 |
|                  | 59      | 18.45 | 22.67 | 4.22 | -0.38 | 1.30 |
|                  | 60      | 18.56 | 21.85 | 3.29 | -0.75 | 1.68 |
|                  | 61      | 18.56 | 22.48 | 3.92 | -0.19 | 1.14 |
|                  | 62      | 17.78 | 21.28 | 3.50 | -0.69 | 1.61 |
|                  | AVERAGE | 18.08 | 22.15 | 4.07 | -0.20 | 1.20 |
|                  | STDEV   | 0.49  | 0.66  | 0.64 | 0.43  | 0.33 |

Fig. 1

C, the relation between BCYRN1 expression and prognosis in 62 pairs of CC tissues analyzed by Kaplan-Meier analysis.

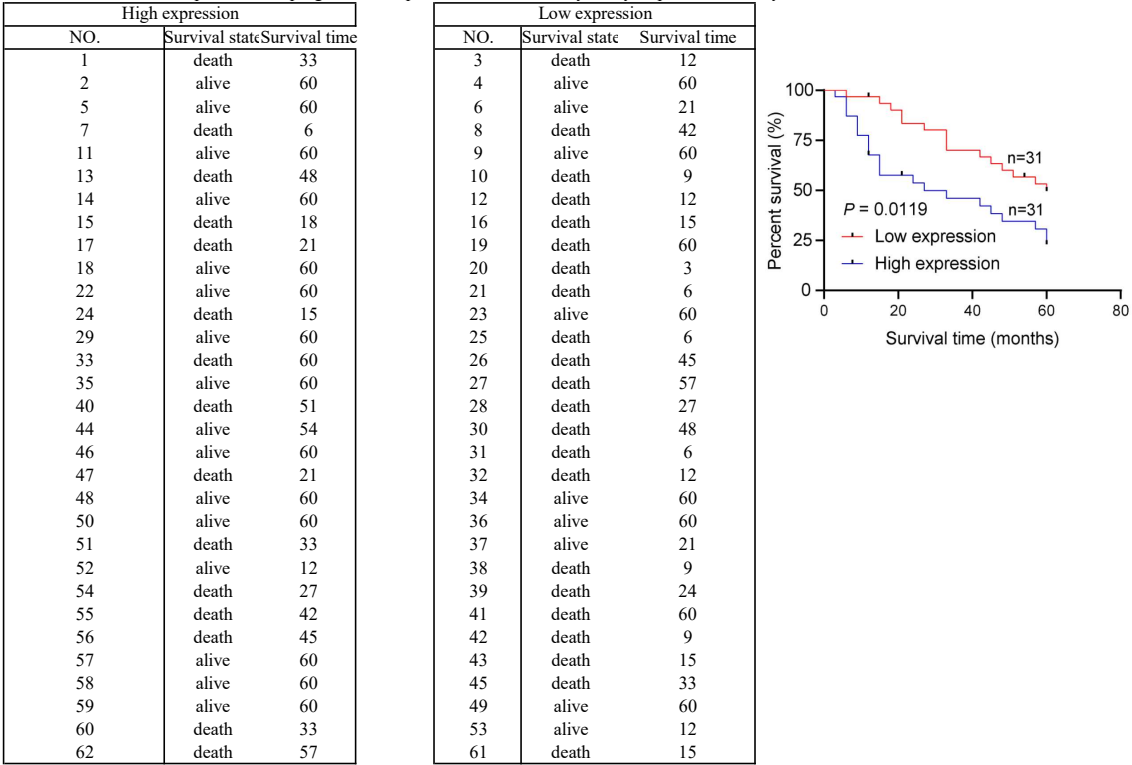

D, DDP-resistance of CC cells in each group examined through MTT assay.

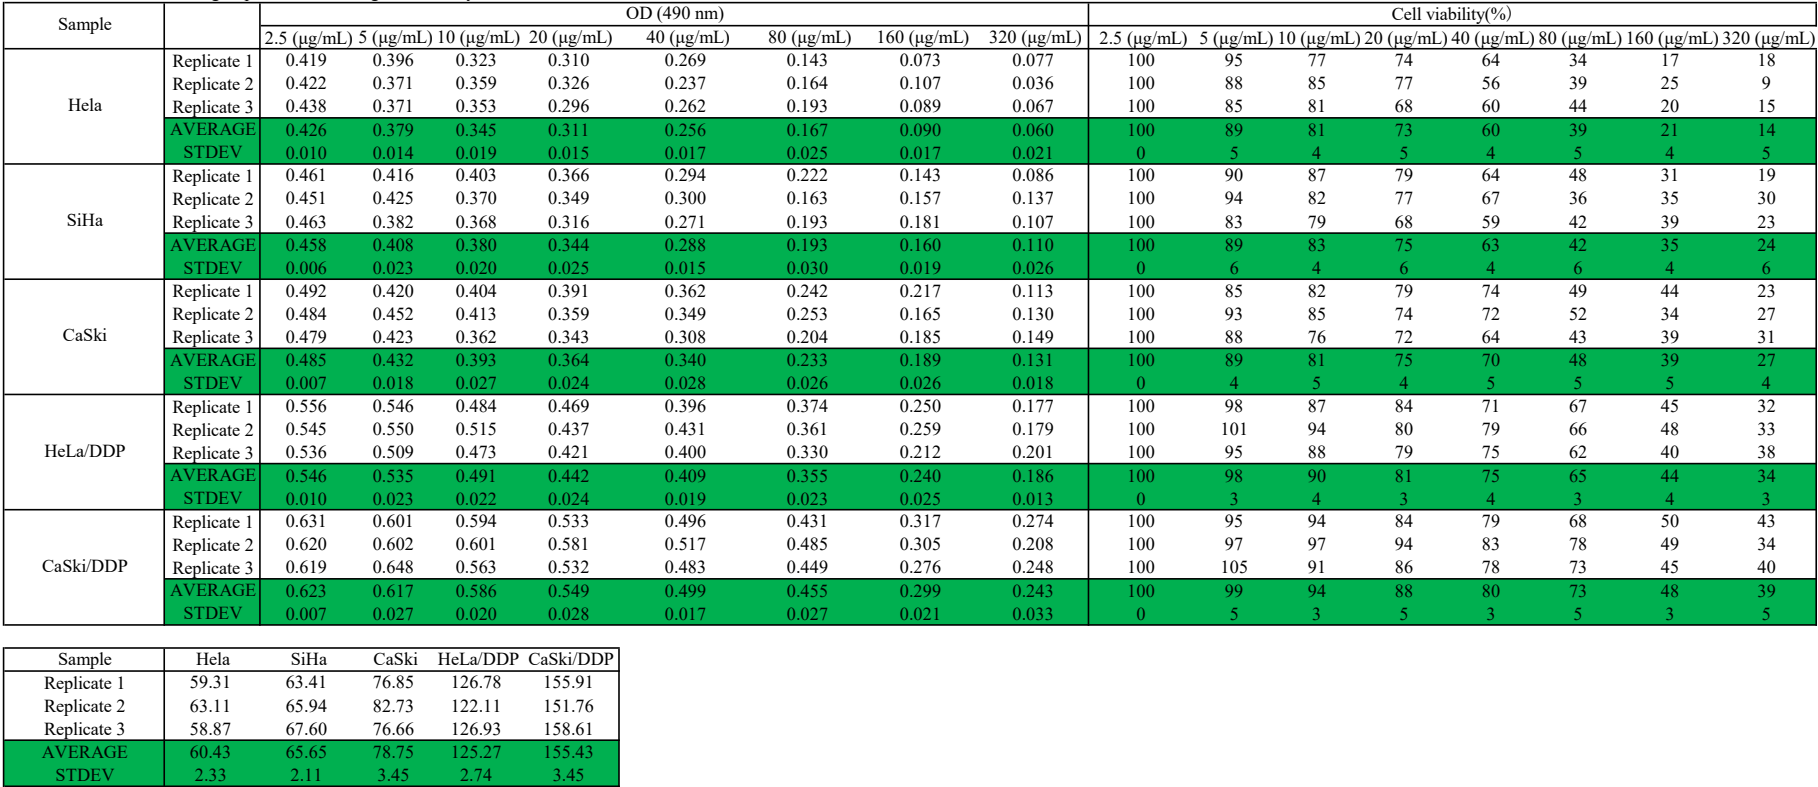

Fig. 1

E, BCYRN1 expression in CC cells verified via RT-qPCR.

| qRT-PCR data of BCYRN1 (GAPDH as internal reference) |             |           |        |        |        |                     |
|------------------------------------------------------|-------------|-----------|--------|--------|--------|---------------------|
| Sample                                               |             | Ct values |        | ΔCt    | ΔΔCt   | relative expression |
|                                                      |             | GAPDH     | BCYRN1 | BCYRN1 | BCYRN1 | BCYRN1              |
| HcerEpic                                             | Replicate 1 | 17.84     | 22.03  | 4.19   | -0.01  | 1.00                |
|                                                      | Replicate 2 | 17.65     | 21.89  | 4.24   | 0.04   | 0.97                |
|                                                      | Replicate 3 | 18.09     | 22.25  | 4.16   | -0.04  | 1.03                |
|                                                      | AVERAGE     | 17.86     | 22.06  | 4.20   | 0.00   | 1.00                |
|                                                      | STDEV       | 0.22      | 0.18   | 0.04   | 0.04   | 0.03                |
| Hela                                                 | Replicate 1 | 17.73     | 20.61  | 2.88   | -1.31  | 2.48                |
|                                                      | Replicate 2 | 18.56     | 21.64  | 3.08   | -1.16  | 2.23                |
|                                                      | Replicate 3 | 18.12     | 20.88  | 2.76   | -1.40  | 2.64                |
|                                                      | AVERAGE     | 18.14     | 21.04  | 2.91   | -1.29  | 2.45                |
|                                                      | STDEV       | 0.42      | 0.53   | 0.16   | 0.12   | 0.20                |
| SiHa                                                 | Replicate 1 | 18.28     | 21.13  | 2.85   | -1.34  | 2.53                |
|                                                      | Replicate 2 | 17.02     | 19.85  | 2.83   | -1.41  | 2.66                |
|                                                      | Replicate 3 | 16.98     | 19.84  | 2.86   | -1.30  | 2.46                |
|                                                      | AVERAGE     | 17.43     | 20.27  | 2.85   | -1.35  | 2.55                |
|                                                      | STDEV       | 0.74      | 0.74   | 0.02   | 0.06   | 0.10                |
| CaSki                                                | Replicate 1 | 17.99     | 20.54  | 2.55   | -1.64  | 3.12                |
|                                                      | Replicate 2 | 18.31     | 20.93  | 2.62   | -1.62  | 3.07                |
|                                                      | Replicate 3 | 17.83     | 20.33  | 2.50   | -1.66  | 3.16                |
|                                                      | AVERAGE     | 18.04     | 20.60  | 2.56   | -1.64  | 3.12                |
|                                                      | STDEV       | 0.24      | 0.30   | 0.06   | 0.02   | 0.04                |
| HeLa/DDP                                             | Replicate 1 | 17.42     | 19.74  | 2.32   | -1.87  | 3.66                |
|                                                      | Replicate 2 | 17.10     | 19.60  | 2.50   | -1.74  | 3.34                |
|                                                      | Replicate 3 | 17.89     | 20.07  | 2.18   | -1.98  | 3.94                |
|                                                      | AVERAGE     | 17.47     | 19.80  | 2.33   | -1.86  | 3.65                |
|                                                      | STDEV       | 0.40      | 0.24   | 0.16   | 0.12   | 0.30                |
| CaSki/DDP                                            | Replicate 1 | 17.86     | 19.92  | 2.06   | -2.13  | 4.38                |
|                                                      | Replicate 2 | 17.29     | 19.47  | 2.18   | -2.06  | 4.17                |
|                                                      | Replicate 3 | 17.89     | 19.86  | 1.97   | -2.19  | 4.56                |
|                                                      | AVERAGE     | 17.68     | 19.75  | 2.07   | -2.13  | 4.37                |
|                                                      | STDEV       | 0.34      | 0.24   | 0.11   | 0.07   | 0.20                |

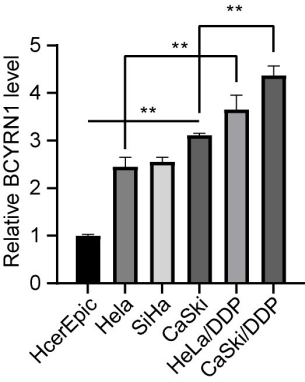

Fig. 2. BCYRN1 knockout reduces DDP-resistance of CC cells.

HeLa/DDP and CaSki/DDP cells were infected with sh-BCYRN1, with sh-NC as NC. A. interfere efficiency of sh-BCYRN1 tested via RT-qPCR.

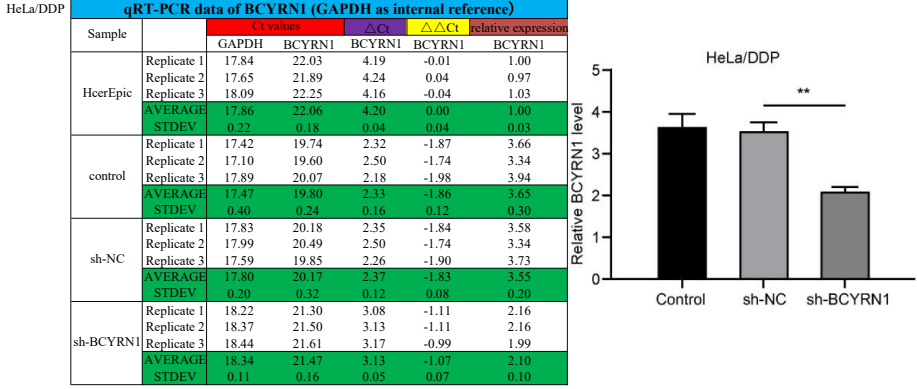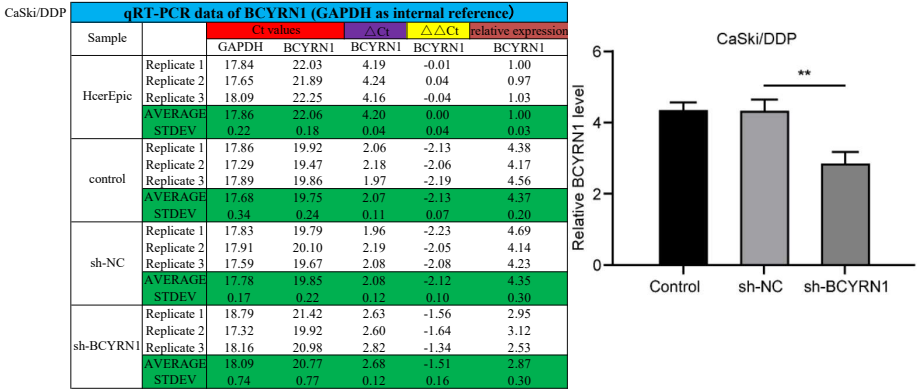

HeLa/DDP and CaSki/DDP cells were infected with sh-BCYRN1, with sh-NC as NC. B and C, cell DDP-resistance determined using MTT assay (B) and colony formation assay (C).

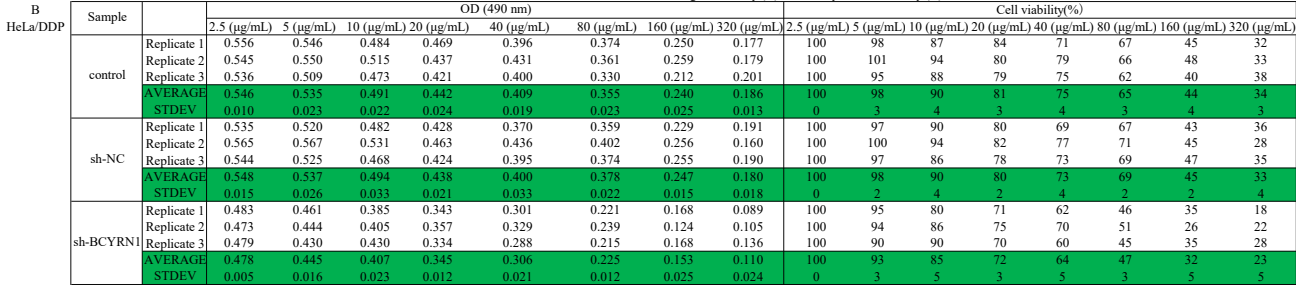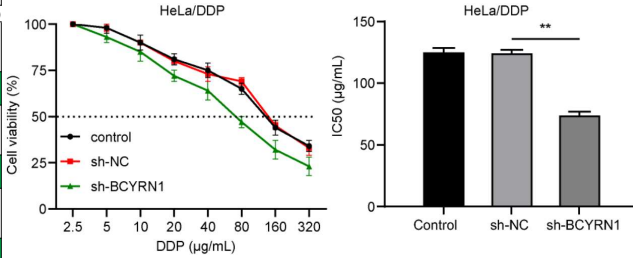

|             |         |        |           |
|-------------|---------|--------|-----------|
| Sample      | control | sh-NC  | sh-BCYRN1 |
| Replicate 1 | 126.78  | 122.24 | 72.41     |
| Replicate 2 | 122.11  | 124.11 | 77.13     |
| Replicate 3 | 126.93  | 127.30 | 73.15     |
| AVERAGE     | 125.27  | 124.55 | 74.23     |
| STDEV       | 2.74    | 2.56   | 2.54      |

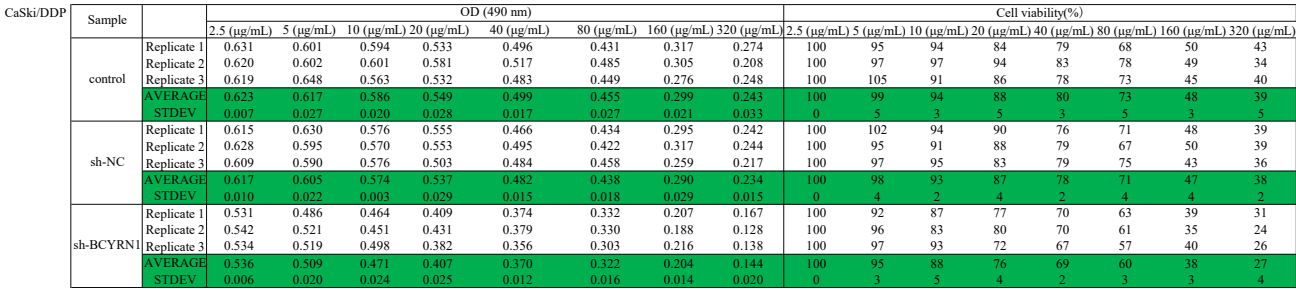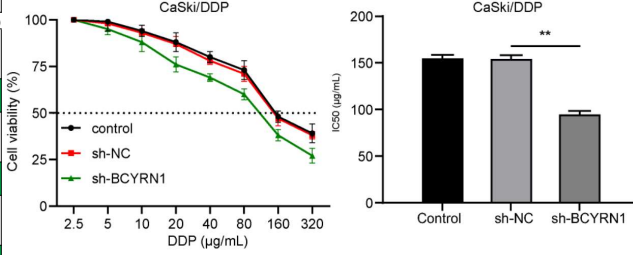

|             |         |        |           |
|-------------|---------|--------|-----------|
| Sample      | control | sh-NC  | sh-BCYRN1 |
| Replicate 1 | 155.91  | 158.23 | 99.01     |
| Replicate 2 | 151.76  | 150.95 | 92.75     |
| Replicate 3 | 158.61  | 155.09 | 94.53     |
| AVERAGE     | 155.43  | 154.76 | 95.43     |
| STDEV       | 3.45    | 3.65   | 3.23      |

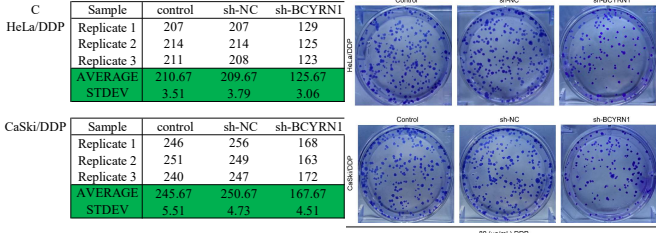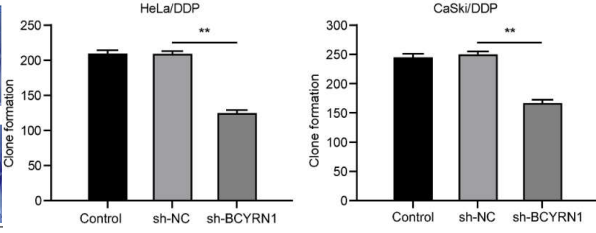

Fig. 3. BCYRN1 competitively binds to miR-330-5p to improve HMGB3 mRNA level.

A. BCYRN1 localization in CC cells predicted via online database (www.esbio.sjtu.edu.cn).

| Subcellular locations |                |
|-----------------------|----------------|
| Cytoplasm             | 0.544372743239 |
| Nucleus               | 0.090174096514 |
| Ribosome              | 0.047786196333 |
| Cytosol               | 0.261352948281 |
| Exosome               | 0.291529245439 |
| Predicted location    |                |
| Cytoplasm             |                |

B. BCYRN1 expression in DDP-resistant CC cells measured by RT-qPCR following the fractionation of nuclear and cytoplasmic RNA assay.

| qRT-PCR data of U6 (GAPDH as internal reference) |           |             |       |             |                   |                     |      |
|--------------------------------------------------|-----------|-------------|-------|-------------|-------------------|---------------------|------|
| Sample                                           |           | Ct values   |       | $\Delta$ Ct | $\Delta\Delta$ Ct | relative expression |      |
|                                                  |           | GAPDH       | U6    | U6          | U6                |                     |      |
| HeLa/DDP                                         | cytoplasm | Replicate 1 | 18.71 | 17.98       | -0.73             | -0.08               | 1.06 |
|                                                  |           | Replicate 2 | 17.99 | 17.37       | -0.62             | 0.03                | 0.98 |
|                                                  |           | Replicate 3 | 17.83 | 17.23       | -0.60             | 0.05                | 0.97 |
|                                                  |           | AVERAGE     | 18.18 | 17.53       | -0.65             | 0.00                | 1.00 |
|                                                  |           | STDEV       | 0.47  | 0.40        | 0.07              | 0.07                | 0.05 |
|                                                  | nucleus   | Replicate 1 | 17.42 | 13.65       | -3.77             | -3.04               | 8.22 |
|                                                  |           | Replicate 2 | 18.08 | 14.97       | -3.11             | -2.49               | 5.62 |
|                                                  |           | Replicate 3 | 17.67 | 13.93       | -3.74             | -3.14               | 8.82 |
|                                                  |           | AVERAGE     | 17.72 | 14.18       | -3.54             | -2.89               | 7.55 |
|                                                  |           | STDEV       | 0.33  | 0.70        | 0.37              | 0.35                | 1.70 |
| CaSki/DDP                                        | cytoplasm | Replicate 1 | 18.39 | 18.35       | -0.04             | 0.04                | 0.97 |
|                                                  |           | Replicate 2 | 17.69 | 17.57       | -0.12             | -0.04               | 1.03 |
|                                                  |           | Replicate 3 | 17.24 | 17.17       | -0.07             | 0.01                | 1.00 |
|                                                  |           | AVERAGE     | 17.77 | 17.70       | -0.08             | 0.00                | 1.00 |
|                                                  |           | STDEV       | 0.56  | 0.60        | 0.04              | 0.04                | 0.03 |
|                                                  | nucleus   | Replicate 1 | 17.38 | 15.57       | -1.81             | -1.77               | 3.41 |
|                                                  |           | Replicate 2 | 17.75 | 15.54       | -2.21             | -2.09               | 4.26 |
|                                                  |           | Replicate 3 | 17.66 | 15.41       | -2.25             | -2.18               | 4.53 |
|                                                  |           | AVERAGE     | 17.60 | 15.51       | -2.09             | -2.01               | 4.07 |
|                                                  |           | STDEV       | 0.19  | 0.09        | 0.24              | 0.22                | 0.58 |

| qRT-PCR data of GAPDH (GAPDH as internal reference) |           |             |       |       |             |       |                     |
|-----------------------------------------------------|-----------|-------------|-------|-------|-------------|-------|---------------------|
| Sample                                              |           | Ct values   |       |       | $\Delta$ Ct |       | relative expression |
|                                                     |           | GAPDH       | GAPDH | GAPDH | GAPDH       | GAPDH |                     |
| HeLa/DDP                                            | cytoplasm | Replicate 1 | 18.26 | 14.34 | -3.92       | 0.15  | 0.90                |
|                                                     |           | Replicate 2 | 17.76 | 13.52 | -4.24       | -0.17 | 1.13                |
|                                                     |           | Replicate 3 | 17.52 | 13.48 | -4.04       | 0.03  | 0.98                |
|                                                     |           | AVERAGE     | 17.85 | 13.78 | -4.07       | 0.00  | 1.00                |
|                                                     |           | STDEV       | 0.38  | 0.49  | 0.16        | 0.16  | 0.11                |
|                                                     | nucleus   | Replicate 1 | 17.71 | 16.74 | -0.97       | 2.95  | 0.13                |
|                                                     |           | Replicate 2 | 18.34 | 16.25 | -2.09       | 2.15  | 0.23                |
|                                                     |           | Replicate 3 | 17.99 | 16.25 | -1.74       | 2.30  | 0.20                |
|                                                     |           | AVERAGE     | 18.01 | 16.41 | -1.60       | 2.47  | 0.19                |
|                                                     |           | STDEV       | 0.32  | 0.28  | 0.57        | 0.43  | 0.05                |
|                                                     | cytoplasm | Replicate 1 | 17.65 | 17.95 | 0.30        | 0.06  | 0.96                |
|                                                     |           | Replicate 2 | 17.96 | 18.23 | 0.27        | 0.03  | 0.98                |
| Replicate 3                                         |           | 18.11       | 18.27 | 0.16  | -0.08       | 1.06  |                     |
| AVERAGE                                             |           | 17.91       | 18.15 | 0.24  | 0.00        | 1.00  |                     |
| STDEV                                               |           | 0.23        | 0.17  | 0.07  | 0.07        | 0.05  |                     |
| CaSki/DDP                                           | nucleus   | Replicate 1 | 18.58 | 21.15 | 2.57        | 2.27  | 0.21                |
|                                                     |           | Replicate 2 | 17.81 | 20.15 | 2.34        | 2.07  | 0.24                |
|                                                     |           | Replicate 3 | 17.63 | 19.47 | 1.84        | 1.68  | 0.31                |
|                                                     |           | AVERAGE     | 18.01 | 20.26 | 2.25        | 2.01  | 0.25                |
|                                                     |           | STDEV       | 0.50  | 0.85  | 0.37        | 0.30  | 0.05                |

| qRT-PCR data of BCYRN1 (GAPDH as internal reference) |           |             |           |        |             |                   |                     |
|------------------------------------------------------|-----------|-------------|-----------|--------|-------------|-------------------|---------------------|
| Sample                                               |           |             | Ct values |        | $\Delta$ Ct | $\Delta\Delta$ Ct | relative expression |
|                                                      |           |             | GAPDH     | BCYRN1 | BCYRN1      | BCYRN1            |                     |
| HeLa/DDP                                             | cytoplasm | Replicate 1 | 17.91     | 20.54  | 2.63        | 0.15              | 0.90                |
|                                                      |           | Replicate 2 | 17.85     | 20.28  | 2.43        | -0.05             | 1.04                |
|                                                      |           | Replicate 3 | 18.05     | 20.43  | 2.38        | -0.10             | 1.07                |
|                                                      |           | AVERAGE     | 17.94     | 20.42  | 2.48        | 0.00              | 1.00                |
|                                                      |           | STDEV       | 0.10      | 0.13   | 0.13        | 0.13              | 0.09                |
|                                                      | nucleus   | Replicate 1 | 17.76     | 22.29  | 4.53        | 1.90              | 0.27                |
|                                                      |           | Replicate 2 | 17.50     | 21.58  | 4.08        | 1.65              | 0.32                |
|                                                      |           | Replicate 3 | 17.55     | 21.28  | 3.73        | 1.35              | 0.39                |
|                                                      |           | AVERAGE     | 17.60     | 21.72  | 4.11        | 1.63              | 0.33                |
|                                                      |           | STDEV       | 0.14      | 0.52   | 0.40        | 0.28              | 0.06                |
|                                                      | cytoplasm | Replicate 1 | 17.57     | 19.96  | 2.39        | 0.06              | 0.96                |
|                                                      |           | Replicate 2 | 17.55     | 19.76  | 2.21        | -0.12             | 1.09                |
| Replicate 3                                          |           | 17.89       | 20.28     | 2.39   | 0.06        | 0.96              |                     |
| AVERAGE                                              |           | 17.67       | 20.00     | 2.33   | 0.00        | 1.00              |                     |
| STDEV                                                |           | 0.19        | 0.26      | 0.10   | 0.10        | 0.07              |                     |
| CaSki/DDP                                            | nucleus   | Replicate 1 | 18.23     | 22.48  | 4.25        | 1.86              | 0.28                |
|                                                      |           | Replicate 2 | 18.01     | 22.20  | 4.19        | 1.98              | 0.25                |
|                                                      |           | Replicate 3 | 18.24     | 22.60  | 4.36        | 1.97              | 0.26                |
|                                                      |           | AVERAGE     | 18.16     | 22.43  | 4.27        | 1.94              | 0.26                |
|                                                      |           | STDEV       | 0.13      | 0.21   | 0.09        | 0.07              | 0.01                |

| HeLa/DDP  | Sample      | U6   | GAPDH | BCYRN1 | U6    | GAPDH | BCYRN1 |
|-----------|-------------|------|-------|--------|-------|-------|--------|
| cytoplasm | Replicate 1 | 1.06 | 0.90  | 0.90   | 11.39 | 87.47 | 77.08  |
|           | Replicate 2 | 0.98 | 1.13  | 1.04   | 14.85 | 83.35 | 76.47  |
|           | Replicate 3 | 0.97 | 0.98  | 1.07   | 9.88  | 82.86 | 73.21  |
|           | AVERAGE     | 1.00 | 1.00  | 1.00   | 12.04 | 84.56 | 75.58  |
|           | STDEV       | 0.05 | 0.11  | 0.09   | 2.55  | 2.53  | 2.08   |
|           |             | 8.22 | 0.13  | 0.27   | 88.61 | 12.53 | 22.92  |
| nucleus   | Replicate 2 | 5.62 | 0.23  | 0.32   | 85.15 | 16.65 | 23.53  |
|           | Replicate 3 | 8.82 | 0.20  | 0.39   | 90.12 | 17.14 | 26.79  |
|           | AVERAGE     | 7.55 | 0.19  | 0.33   | 87.96 | 15.44 | 24.42  |
|           | STDEV       | 1.70 | 0.05  | 0.06   | 2.55  | 2.53  | 2.08   |

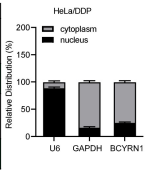

C. the binding sites of BCYRN1 and miR-330-5p and of miR-330-5p and HMGB3 predicted via RNA22 and Starbase databases.

| miR Name                        | transcript name                                                                          | leftmost position of predicted target site | folding energy (in -Kcal/mol) | heteroduplex                                                 | p value |
|---------------------------------|------------------------------------------------------------------------------------------|--------------------------------------------|-------------------------------|--------------------------------------------------------------|---------|
| hsa-miR-301b-3p<br>MIMAT0004893 | NC_000002.12_47335315_47335514<br>Human sapiens chromosome 2,GRCh38.p13 Primary Assembly | 21                                         | -18.50                        | GCGCTATATCCAGCTCTCAGGGA<br>     <br>CGGATCTCTGTGTC-CGGGTCCTC | 3.74E-3 |



Fig. 3

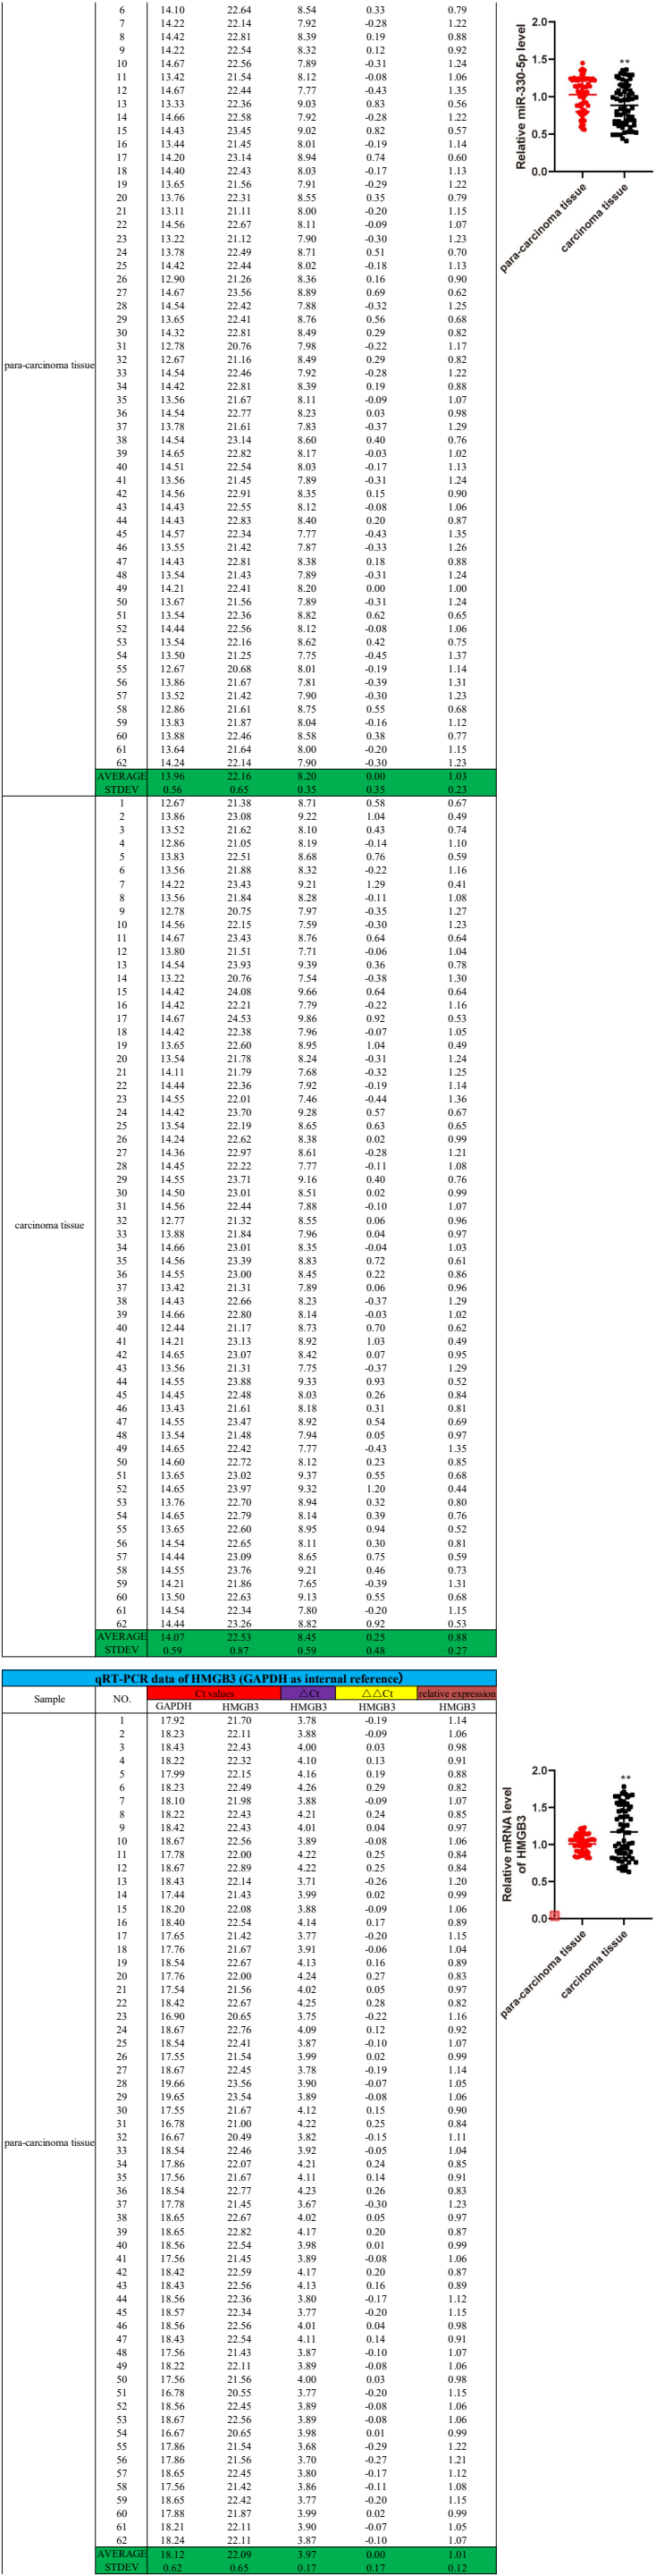



|                  |         |       |       |      |       |      |
|------------------|---------|-------|-------|------|-------|------|
| carcinoma tissue | 1       | 17.83 | 20.89 | 3.06 | -0.72 | 1.64 |
|                  | 2       | 17.56 | 21.63 | 4.07 | 0.19  | 0.88 |
|                  | 3       | 18.22 | 22.27 | 4.05 | 0.05  | 0.97 |
|                  | 4       | 17.56 | 21.76 | 4.20 | 0.10  | 0.93 |
|                  | 5       | 16.78 | 20.28 | 3.50 | -0.66 | 1.58 |
|                  | 6       | 17.56 | 21.10 | 3.54 | -0.72 | 1.65 |
|                  | 7       | 18.22 | 21.27 | 3.05 | -0.83 | 1.77 |
|                  | 8       | 17.56 | 21.35 | 3.79 | -0.42 | 1.34 |
|                  | 9       | 16.78 | 20.15 | 3.37 | -0.64 | 1.56 |
|                  | 10      | 18.56 | 21.83 | 3.27 | -0.62 | 1.54 |
|                  | 11      | 17.80 | 21.60 | 3.80 | -0.42 | 1.34 |
|                  | 12      | 18.54 | 22.90 | 4.36 | 0.14  | 0.91 |
|                  | 13      | 18.22 | 21.71 | 3.49 | -0.22 | 1.16 |
|                  | 14      | 18.42 | 22.69 | 4.27 | 0.28  | 0.82 |
|                  | 15      | 17.43 | 20.85 | 3.42 | -0.46 | 1.38 |
|                  | 16      | 17.86 | 22.30 | 4.44 | 0.30  | 0.81 |
|                  | 17      | 17.20 | 21.05 | 3.85 | 0.08  | 0.95 |
|                  | 18      | 18.42 | 22.68 | 4.26 | 0.35  | 0.78 |
|                  | 19      | 17.56 | 21.43 | 3.87 | -0.26 | 1.20 |
|                  | 20      | 18.24 | 23.10 | 4.86 | 0.62  | 0.65 |
|                  | 21      | 18.11 | 22.52 | 4.41 | 0.39  | 0.76 |
|                  | 22      | 18.44 | 22.75 | 4.31 | 0.06  | 0.96 |
|                  | 23      | 18.55 | 22.97 | 4.42 | 0.67  | 0.63 |
|                  | 24      | 18.42 | 21.75 | 3.33 | -0.76 | 1.69 |
|                  | 25      | 17.56 | 21.76 | 4.20 | 0.33  | 0.80 |
|                  | 26      | 18.24 | 22.78 | 4.54 | 0.55  | 0.68 |
|                  | 27      | 18.66 | 22.70 | 4.04 | 0.26  | 0.84 |
|                  | 28      | 17.44 | 21.86 | 4.42 | 0.52  | 0.70 |
|                  | 29      | 18.21 | 21.43 | 3.22 | -0.67 | 1.59 |
|                  | 30      | 18.65 | 22.75 | 4.10 | -0.02 | 1.01 |
|                  | 31      | 18.56 | 22.71 | 4.15 | -0.07 | 1.05 |
|                  | 32      | 17.77 | 21.78 | 4.01 | 0.19  | 0.88 |
|                  | 33      | 17.88 | 22.30 | 4.42 | 0.50  | 0.71 |
|                  | 34      | 18.11 | 22.63 | 4.52 | 0.31  | 0.81 |
|                  | 35      | 17.44 | 21.74 | 4.30 | 0.19  | 0.88 |
|                  | 36      | 18.56 | 23.18 | 4.62 | 0.39  | 0.76 |
|                  | 37      | 18.43 | 21.56 | 3.13 | -0.54 | 1.45 |
|                  | 38      | 17.56 | 20.84 | 3.28 | -0.74 | 1.67 |
|                  | 39      | 18.56 | 22.40 | 3.84 | -0.33 | 1.26 |
|                  | 40      | 18.45 | 22.58 | 4.13 | 0.15  | 0.90 |
|                  | 41      | 17.55 | 21.81 | 4.26 | 0.37  | 0.77 |
|                  | 42      | 18.45 | 22.65 | 4.20 | 0.03  | 0.98 |
|                  | 43      | 18.32 | 21.85 | 3.53 | -0.60 | 1.52 |
|                  | 44      | 17.45 | 21.03 | 3.58 | -0.22 | 1.16 |
|                  | 45      | 18.45 | 22.25 | 3.80 | 0.03  | 0.98 |
|                  | 46      | 17.43 | 20.98 | 3.55 | -0.45 | 1.37 |
|                  | 47      | 18.55 | 22.34 | 3.79 | -0.32 | 1.25 |
|                  | 48      | 17.54 | 20.84 | 3.30 | -0.57 | 1.48 |
|                  | 49      | 18.65 | 23.16 | 4.51 | 0.62  | 0.65 |
|                  | 50      | 18.60 | 22.57 | 3.97 | -0.03 | 1.02 |
|                  | 51      | 17.65 | 20.71 | 3.06 | -0.71 | 1.64 |
|                  | 52      | 18.54 | 21.66 | 3.12 | -0.77 | 1.71 |
|                  | 53      | 16.89 | 20.54 | 3.65 | -0.24 | 1.18 |
|                  | 54      | 18.56 | 21.99 | 3.43 | -0.55 | 1.46 |
|                  | 55      | 18.33 | 21.47 | 3.14 | -0.54 | 1.45 |
|                  | 56      | 18.45 | 21.40 | 2.95 | -0.75 | 1.68 |
|                  | 57      | 18.56 | 21.91 | 3.35 | -0.45 | 1.37 |
|                  | 58      | 17.44 | 20.96 | 3.52 | -0.34 | 1.27 |
|                  | 59      | 18.55 | 21.69 | 3.14 | -0.63 | 1.55 |
|                  | 60      | 18.21 | 21.47 | 3.26 | -0.73 | 1.66 |
|                  | 61      | 17.50 | 20.77 | 3.27 | -0.63 | 1.55 |
|                  | 62      | 17.78 | 21.63 | 3.85 | -0.02 | 1.01 |
|                  | AVERAGE | 18.02 | 21.83 | 3.81 | -0.16 | 1.17 |
|                  | STDEV   | 0.52  | 0.76  | 0.50 | 0.45  | 0.35 |

G, expression of miR-330-5p and HMGB3 mRNA in CC cells examined by RT-qPCR.

| qRT-PCR data of miR-330-5p (U6 as internal reference) |             |            |                   |            |                     |
|-------------------------------------------------------|-------------|------------|-------------------|------------|---------------------|
| Sample                                                | Ct values   |            | $\Delta\Delta Ct$ |            | relative expression |
|                                                       | U6          | miR-330-5p | miR-330-5p        | miR-330-5p |                     |
| HecrEpic                                              | Replicate 1 | 13.89      | 22.09             | 8.20       | -0.04               |
|                                                       | Replicate 2 | 13.98      | 22.21             | 8.23       | -0.01               |
|                                                       | Replicate 3 | 14.33      | 22.62             | 8.29       | 0.05                |
|                                                       | AVERAGE     | 14.07      | 22.31             | 8.24       | 0.00                |
|                                                       | STDEV       | 0.23       | 0.28              | 0.05       | 0.03                |
| Hela                                                  | Replicate 1 | 13.72      | 22.63             | 8.91       | 0.71                |
|                                                       | Replicate 2 | 13.62      | 22.66             | 9.04       | 0.81                |
|                                                       | Replicate 3 | 13.50      | 22.41             | 8.91       | 0.62                |
|                                                       | AVERAGE     | 13.61      | 22.57             | 8.95       | 0.71                |
|                                                       | STDEV       | 0.11       | 0.14              | 0.08       | 0.10                |
| SiHa                                                  | Replicate 1 | 13.69      | 22.59             | 8.90       | 0.70                |
|                                                       | Replicate 2 | 13.50      | 22.61             | 9.11       | 0.88                |
|                                                       | Replicate 3 | 14.13      | 23.13             | 9.00       | 0.71                |
|                                                       | AVERAGE     | 13.77      | 22.78             | 9.00       | 0.76                |
|                                                       | STDEV       | 0.32       | 0.31              | 0.11       | 0.10                |
| CaSki                                                 | Replicate 1 | 13.64      | 22.98             | 9.34       | 1.14                |
|                                                       | Replicate 2 | 13.22      | 22.53             | 9.31       | 1.08                |
|                                                       | Replicate 3 | 14.16      | 23.41             | 9.25       | 0.96                |
|                                                       | AVERAGE     | 13.67      | 22.97             | 9.30       | 1.06                |
|                                                       | STDEV       | 0.47       | 0.44              | 0.05       | 0.09                |
| HeLa/DDP                                              | Replicate 1 | 14.53      | 24.06             | 9.53       | 1.33                |
|                                                       | Replicate 2 | 14.74      | 24.01             | 9.27       | 1.04                |
|                                                       | Replicate 3 | 13.63      | 23.22             | 9.59       | 1.30                |
|                                                       | AVERAGE     | 14.30      | 23.76             | 9.46       | 1.22                |
|                                                       | STDEV       | 0.59       | 0.47              | 0.17       | 0.16                |
| CaSki/DDP                                             | Replicate 1 | 13.73      | 23.63             | 9.90       | 1.70                |
|                                                       | Replicate 2 | 13.41      | 23.17             | 9.76       | 1.53                |
|                                                       | Replicate 3 | 13.77      | 24.08             | 10.31      | 2.02                |
|                                                       | AVERAGE     | 13.64      | 23.63             | 9.99       | 1.75                |
|                                                       | STDEV       | 0.20       | 0.46              | 0.29       | 0.25                |

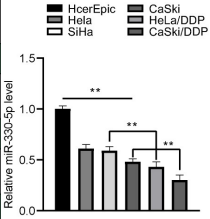

| qRT-PCR data of miR-330-5p (U6 as internal reference) |             |            |                   |            |                     |
|-------------------------------------------------------|-------------|------------|-------------------|------------|---------------------|
| Sample                                                | Ct values   |            | $\Delta\Delta Ct$ |            | relative expression |
|                                                       | U6          | miR-330-5p | miR-330-5p        | miR-330-5p |                     |
| HecrEpic                                              | Replicate 1 | 13.89      | 22.09             | 8.20       | -0.04               |
|                                                       | Replicate 2 | 13.98      | 22.21             | 8.23       | -0.01               |
|                                                       | Replicate 3 | 14.33      | 22.62             | 8.29       | 0.05                |
|                                                       | AVERAGE     | 14.07      | 22.31             | 8.24       | 0.00                |
|                                                       | STDEV       | 0.23       | 0.28              | 0.05       | 0.03                |
| control                                               | Replicate 1 | 14.53      | 24.06             | 9.53       | 1.33                |
|                                                       | Replicate 2 | 14.74      | 24.01             | 9.27       | 1.04                |
|                                                       | Replicate 3 | 13.63      | 23.22             | 9.59       | 1.30                |
|                                                       | AVERAGE     | 14.30      | 23.76             | 9.46       | 1.22                |
|                                                       | STDEV       | 0.59       | 0.47              | 0.17       | 0.16                |
| sh-NC                                                 | Replicate 1 | 13.86      | 23.35             | 9.49       | 1.29                |
|                                                       | Replicate 2 | 13.56      | 22.88             | 9.32       | 1.09                |
|                                                       | Replicate 3 | 14.38      | 23.85             | 9.47       | 1.18                |
|                                                       | AVERAGE     | 13.93      | 23.36             | 9.43       | 1.19                |
|                                                       | STDEV       | 0.41       | 0.49              | 0.09       | 0.10                |
| sh-BCYRN1                                             | Replicate 1 | 13.31      | 21.76             | 8.45       | 0.25                |
|                                                       | Replicate 2 | 13.47      | 21.95             | 8.48       | 0.25                |
|                                                       | Replicate 3 | 14.43      | 22.83             | 8.40       | 0.11                |
|                                                       | AVERAGE     | 13.74      | 22.18             | 8.44       | 0.20                |
|                                                       | STDEV       | 0.61       | 0.57              | 0.04       | 0.08                |

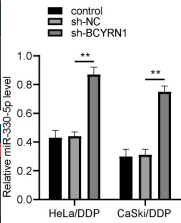

| qRT-PCR data of miR-330-5p (U6 as internal reference) |             |            |                   |            |                     |
|-------------------------------------------------------|-------------|------------|-------------------|------------|---------------------|
| Sample                                                | Ct values   |            | $\Delta\Delta Ct$ |            | relative expression |
|                                                       | U6          | miR-330-5p | miR-330-5p        | miR-330-5p |                     |
| HecrEpic                                              | Replicate 1 | 13.89      | 22.09             | 8.20       | -0.04               |
|                                                       | Replicate 2 | 13.98      | 22.21             | 8.23       | -0.01               |
|                                                       | Replicate 3 | 14.33      | 22.62             | 8.29       | 0.05                |
|                                                       | AVERAGE     | 14.07      | 22.31             | 8.24       | 0.00                |
|                                                       | STDEV       | 0.23       | 0.28              | 0.05       | 0.03                |
| control                                               | Replicate 1 | 13.73      | 23.63             | 9.90       | 1.70                |
|                                                       | Replicate 2 | 13.41      | 23.17             | 9.76       | 1.53                |
|                                                       | Replicate 3 | 13.77      | 24.08             | 10.31      | 2.02                |
|                                                       | AVERAGE     | 13.64      | 23.63             | 9.99       | 1.75                |
|                                                       | STDEV       | 0.20       | 0.46              | 0.29       | 0.25                |
| sh-NC                                                 | Replicate 1 | 14.10      | 23.88             | 9.78       | 1.58                |
|                                                       | Replicate 2 | 14.04      | 23.86             | 9.82       | 1.59                |
|                                                       | Replicate 3 | 14.32      | 24.53             | 10.21      | 1.92                |
|                                                       | AVERAGE     | 14.15      | 24.09             | 9.94       | 1.70                |
|                                                       | STDEV       | 0.15       | 0.38              | 0.24       | 0.19                |
| sh-BCYRN1                                             | Replicate 1 | 13.97      | 22.53             | 8.56       | 0.36                |
|                                                       | Replicate 2 | 13.98      | 22.71             | 8.73       | 0.50                |
|                                                       | Replicate 3 | 13.57      | 22.25             | 8.68       | 0.39                |
|                                                       | AVERAGE     | 13.84      | 22.50             | 8.66       | 0.42                |
|                                                       | STDEV       | 0.23       | 0.23              | 0.09       | 0.07                |

| qRT-PCR data of HMGB3 (GAPDH as internal reference) |             |       |                   |       |                     |
|-----------------------------------------------------|-------------|-------|-------------------|-------|---------------------|
| Sample                                              | Ct values   |       | $\Delta\Delta Ct$ |       | relative expression |
|                                                     | GAPDH       | HMGB3 | HMGB3             | HMGB3 |                     |
| HecrEpic                                            | Replicate 1 | 18.15 | 22.14             | 3.99  | -0.01               |
|                                                     | Replicate 2 | 18.06 | 22.11             | 4.05  | 0.05                |
|                                                     | Replicate 3 | 17.76 | 21.72             | 3.96  | -0.04               |
|                                                     | AVERAGE     | 17.99 | 21.99             | 4.00  | 0.00                |
|                                                     | STDEV       | 0.20  | 0.23              | 0.05  | 0.03                |
| Hela                                                | Replicate 1 | 17.25 | 20.42             | 3.17  | -0.82               |
|                                                     | Replicate 2 | 17.80 | 21.03             | 3.23  | -0.82               |
|                                                     | Replicate 3 | 18.37 | 21.47             | 3.10  | -0.86               |
|                                                     | AVERAGE     | 17.81 | 20.97             | 3.17  | -0.83               |
|                                                     | STDEV       | 0.56  | 0.53              | 0.07  | 0.02                |
| SiHa                                                | Replicate 1 | 17.18 | 20.26             | 3.08  | -0.91               |
|                                                     | Replicate 2 | 18.00 | 21.19             | 3.19  | -0.86               |
|                                                     | Replicate 3 | 18.31 | 21.34             | 3.03  | -0.93               |
|                                                     | AVERAGE     | 17.83 | 20.93             | 3.10  | -0.90               |
|                                                     | STDEV       | 0.58  | 0.59              | 0.08  | 0.04                |
| CaSki                                               | Replicate 1 | 18.28 | 20.96             | 2.68  | -1.31               |
|                                                     | Replicate 2 | 17.70 | 20.47             | 2.77  | -1.28               |
|                                                     | Replicate 3 | 18.22 | 20.90             | 2.68  | -1.28               |
|                                                     | AVERAGE     | 18.07 | 20.78             | 2.71  | -1.29               |
|                                                     | STDEV       | 0.32  | 0.27              | 0.05  | 0.02                |
| HeLa/DDP                                            | Replicate 1 | 17.87 | 20.39             | 2.52  | -1.47               |
|                                                     | Replicate 2 | 17.61 | 20.17             | 2.56  | -1.49               |
|                                                     | Replicate 3 | 17.66 | 20.16             | 2.50  | -1.46               |
|                                                     | AVERAGE     | 17.71 | 20.24             | 2.53  | -1.47               |
|                                                     | STDEV       | 0.14  | 0.13              | 0.03  | 0.02                |
| CaSki/DDP                                           | Replicate 1 | 17.62 | 19.74             | 2.12  | -1.87               |
|                                                     | Replicate 2 | 19.04 | 21.26             | 2.22  | -1.83               |
|                                                     | Replicate 3 | 17.57 | 19.74             | 2.17  | -1.79               |
|                                                     | AVERAGE     | 18.08 | 20.25             | 2.17  | -1.83               |
|                                                     | STDEV       | 0.83  | 0.88              | 0.05  | 0.04                |

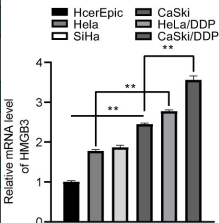

| HeLa/DDP |             | qRT-PCR data of HMGB3 (GAPDH as internal reference) |       |                   |       |                     |
|----------|-------------|-----------------------------------------------------|-------|-------------------|-------|---------------------|
| Sample   |             | Ct values                                           |       | $\Delta\Delta Ct$ |       | Relative expression |
|          |             | GAPDH                                               | HMGB3 | HMGB3             | HMGB3 |                     |
| HecrEpic | Replicate 1 | 18.15                                               | 22.14 | 3.99              | -0.01 | 1.01                |
|          | Replicate 2 | 18.06                                               | 22.11 | 4.05              | 0.05  | 0.97                |
|          | Replicate 3 | 17.76                                               | 21.72 | 3.96              | -0.04 | 1.03                |
|          | AVERAGE     | 17.99                                               | 21.99 | 4.00              | 0.00  | 1.00                |
|          | STDEV       | 0.20                                                | 0.23  | 0.05              | 0.05  | 0.03                |
|          |             |                                                     |       |                   |       |                     |

Fig. 3

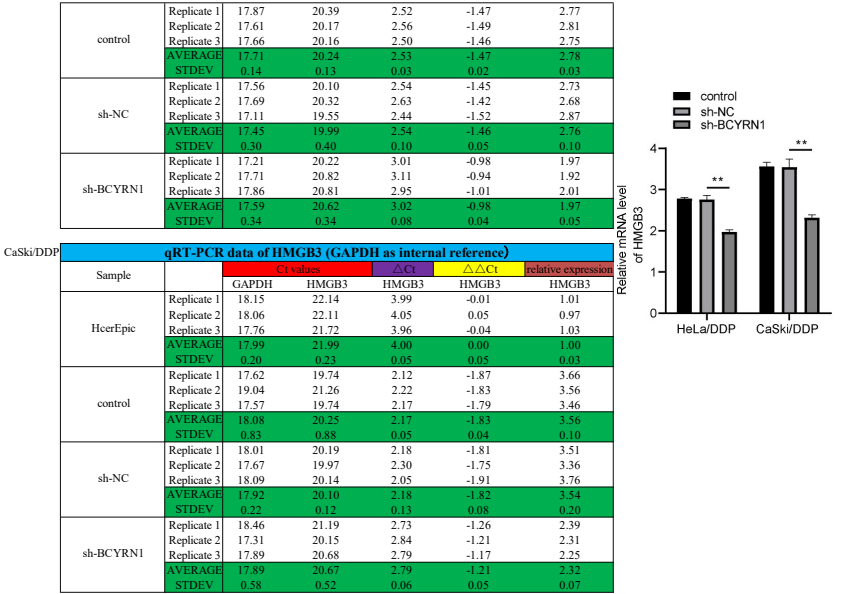

H, correlation between BCYRN1 and HMGB3 and between miR-330-5p and HMGB3 analyzed by pearson's correction analysis.

| NO. | BCYRN1 | miR-330-5p | NO. | BCYRN1 | miR-330-5p |
|-----|--------|------------|-----|--------|------------|
| 1   | 1.48   | 0.67       | 32  | 1.01   | 0.96       |
| 2   | 1.27   | 0.49       | 33  | 1.43   | 0.97       |
| 3   | 1.11   | 0.74       | 34  | 0.72   | 1.03       |
| 4   | 0.59   | 1.10       | 35  | 1.38   | 0.61       |
| 5   | 1.27   | 0.59       | 36  | 0.69   | 0.86       |
| 6   | 1.11   | 1.16       | 37  | 0.95   | 0.96       |
| 7   | 1.92   | 0.41       | 38  | 0.90   | 1.29       |
| 8   | 1.01   | 1.08       | 39  | 1.09   | 1.02       |
| 9   | 0.62   | 1.27       | 40  | 1.55   | 0.62       |
| 10  | 1.16   | 1.23       | 41  | 0.77   | 0.49       |
| 11  | 1.39   | 0.64       | 42  | 0.97   | 0.95       |
| 12  | 1.02   | 1.04       | 43  | 0.99   | 1.29       |
| 13  | 1.64   | 0.78       | 44  | 1.45   | 0.52       |
| 14  | 1.23   | 1.30       | 45  | 1.03   | 0.84       |
| 15  | 1.71   | 0.64       | 46  | 1.41   | 0.81       |
| 16  | 1.12   | 1.16       | 47  | 1.52   | 0.69       |
| 17  | 1.48   | 0.53       | 48  | 1.26   | 0.97       |
| 18  | 1.27   | 1.05       | 49  | 0.59   | 1.35       |
| 19  | 0.74   | 0.49       | 50  | 1.23   | 0.85       |
| 20  | 1.22   | 1.24       | 51  | 1.52   | 0.68       |
| 21  | 1.14   | 1.25       | 52  | 1.80   | 0.44       |
| 22  | 1.26   | 1.14       | 53  | 1.00   | 0.80       |
| 23  | 0.53   | 1.36       | 54  | 1.69   | 0.76       |
| 24  | 1.72   | 0.67       | 55  | 1.67   | 0.52       |
| 25  | 0.83   | 0.65       | 56  | 1.65   | 0.81       |
| 26  | 1.00   | 0.99       | 57  | 1.23   | 0.59       |
| 27  | 0.97   | 1.21       | 58  | 1.27   | 0.73       |
| 28  | 0.92   | 1.08       | 59  | 1.30   | 1.31       |
| 29  | 1.24   | 0.76       | 60  | 1.68   | 0.68       |
| 30  | 0.80   | 0.99       | 61  | 1.14   | 1.15       |
| 31  | 1.21   | 1.07       | 62  | 1.61   | 0.53       |

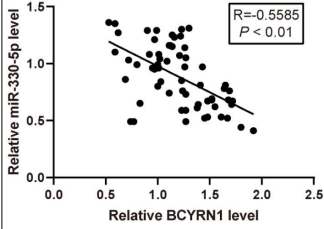

| NO. | BCYRN1 | HMGB3 | NO. | BCYRN1 | HMGB3 |
|-----|--------|-------|-----|--------|-------|
| 1   | 1.48   | 1.65  | 32  | 1.01   | 0.88  |
| 2   | 1.27   | 0.88  | 33  | 1.43   | 0.71  |
| 3   | 1.11   | 0.97  | 34  | 0.72   | 0.81  |
| 4   | 0.59   | 0.93  | 35  | 1.38   | 0.88  |
| 5   | 1.27   | 1.58  | 36  | 0.69   | 0.76  |
| 6   | 1.11   | 1.65  | 37  | 0.95   | 1.45  |
| 7   | 1.92   | 1.78  | 38  | 0.90   | 1.67  |
| 8   | 1.01   | 1.34  | 39  | 1.09   | 1.26  |
| 9   | 0.62   | 1.56  | 40  | 1.55   | 0.90  |
| 10  | 1.16   | 1.54  | 41  | 0.77   | 0.77  |
| 11  | 1.39   | 1.34  | 42  | 0.97   | 0.98  |
| 12  | 1.02   | 0.91  | 43  | 0.99   | 1.51  |
| 13  | 1.64   | 1.16  | 44  | 1.45   | 1.16  |
| 14  | 1.23   | 0.82  | 45  | 1.03   | 0.98  |
| 15  | 1.71   | 1.38  | 46  | 1.41   | 1.37  |
| 16  | 1.12   | 0.81  | 47  | 1.52   | 1.25  |
| 17  | 1.48   | 0.95  | 48  | 1.26   | 1.48  |
| 18  | 1.27   | 0.78  | 49  | 0.59   | 0.65  |
| 19  | 0.74   | 1.20  | 50  | 1.23   | 1.02  |
| 20  | 1.22   | 0.65  | 51  | 1.52   | 1.64  |
| 21  | 1.14   | 0.76  | 52  | 1.80   | 1.71  |
| 22  | 1.26   | 0.96  | 53  | 1.00   | 1.18  |
| 23  | 0.53   | 0.63  | 54  | 1.69   | 1.46  |
| 24  | 1.72   | 1.69  | 55  | 1.67   | 1.45  |
| 25  | 0.83   | 0.80  | 56  | 1.65   | 1.68  |
| 26  | 1.00   | 0.68  | 57  | 1.23   | 1.37  |
| 27  | 0.97   | 0.84  | 58  | 1.27   | 1.27  |
| 28  | 0.92   | 0.70  | 59  | 1.30   | 1.55  |
| 29  | 1.24   | 1.59  | 60  | 1.68   | 1.66  |
| 30  | 0.80   | 1.01  | 61  | 1.14   | 1.55  |
| 31  | 1.21   | 1.05  | 62  | 1.61   | 1.01  |

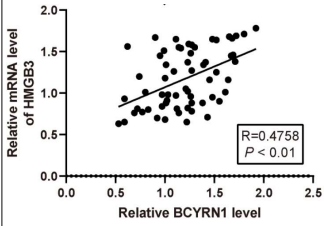

Fig. 4

Fig. 4. miR-330-5p depletion neutralizes the suppressive function of BCYRN1 knockdown to DDP-resistance of CC cells.

miR-330-5p inhibitor was transfected into HeLa/DDP cells with silenced BCYRN1, with inhibitor NC as NC. A, miR-330-5p inhibitor transfection efficiency in CC cells determined by RT-qPCR.

| qRT-PCR data of miR-330-5p (U6 as internal reference) |             |           |            |                     |            |
|-------------------------------------------------------|-------------|-----------|------------|---------------------|------------|
| Sample                                                |             | Ct values |            | relative expression |            |
|                                                       |             | U6        | miR-330-5p | miR-330-5p          | miR-330-5p |
| HeerEpic                                              | Replicate 1 | 13.89     | 22.09      | 8.20                | -0.04      |
|                                                       | Replicate 2 | 13.98     | 22.21      | 8.23                | -0.01      |
|                                                       | Replicate 3 | 14.33     | 22.62      | 8.29                | 0.05       |
|                                                       | AVERAGE     | 14.07     | 22.31      | 8.24                | 0.00       |
|                                                       | STDEV       | 0.23      | 0.28       | 0.05                | 0.03       |
| sh-BCYRN1                                             | Replicate 1 | 13.31     | 21.76      | 8.45                | 0.25       |
|                                                       | Replicate 2 | 13.47     | 21.95      | 8.48                | 0.25       |
|                                                       | Replicate 3 | 14.43     | 22.83      | 8.40                | 0.11       |
|                                                       | AVERAGE     | 13.74     | 22.18      | 8.44                | 0.20       |
|                                                       | STDEV       | 0.61      | 0.57       | 0.04                | 0.05       |
| sh-BCYRN1 + NC                                        | Replicate 1 | 18.77     | 27.23      | 8.46                | 0.26       |
|                                                       | Replicate 2 | 18.59     | 26.99      | 8.40                | 0.17       |
|                                                       | Replicate 3 | 18.58     | 27.00      | 8.42                | 0.13       |
|                                                       | AVERAGE     | 18.65     | 27.07      | 8.43                | 0.19       |
|                                                       | STDEV       | 0.11      | 0.14       | 0.03                | 0.07       |
| sh-BCYRN1 + inhibitor                                 | Replicate 1 | 18.13     | 27.20      | 9.07                | 0.87       |
|                                                       | Replicate 2 | 17.97     | 27.12      | 9.15                | 0.92       |
|                                                       | Replicate 3 | 18.03     | 27.05      | 9.02                | 0.73       |
|                                                       | AVERAGE     | 18.04     | 27.12      | 9.08                | 0.84       |
|                                                       | STDEV       | 0.08      | 0.08       | 0.07                | 0.10       |

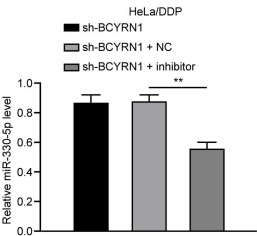

miR-330-5p inhibitor was transfected into HeLa/DDP cells with silenced BCYRN1, with inhibitor NC as NC. B and C, cell resistance assessed via MTT (B) assay and colony formation assay (C).

| Sample                |             | OD (490 nm) |           |            |            |            |            |             |             | Cell viability(%) |           |            |            |            |            |             |             |
|-----------------------|-------------|-------------|-----------|------------|------------|------------|------------|-------------|-------------|-------------------|-----------|------------|------------|------------|------------|-------------|-------------|
|                       |             | 2.5 (μg/mL) | 5 (μg/mL) | 10 (μg/mL) | 20 (μg/mL) | 40 (μg/mL) | 80 (μg/mL) | 160 (μg/mL) | 320 (μg/mL) | 2.5 (μg/mL)       | 5 (μg/mL) | 10 (μg/mL) | 20 (μg/mL) | 40 (μg/mL) | 80 (μg/mL) | 160 (μg/mL) | 320 (μg/mL) |
| sh-BCYRN1             | Replicate 1 | 0.483       | 0.461     | 0.385      | 0.343      | 0.301      | 0.221      | 0.168       | 0.089       | 100               | 95        | 80         | 71         | 62         | 46         | 35          | 18          |
|                       | Replicate 2 | 0.473       | 0.444     | 0.405      | 0.357      | 0.329      | 0.239      | 0.124       | 0.105       | 100               | 94        | 86         | 75         | 70         | 51         | 26          | 22          |
|                       | Replicate 3 | 0.479       | 0.430     | 0.430      | 0.334      | 0.288      | 0.215      | 0.168       | 0.136       | 100               | 90        | 90         | 70         | 60         | 45         | 35          | 28          |
|                       | AVERAGE     | 0.478       | 0.445     | 0.407      | 0.345      | 0.306      | 0.225      | 0.153       | 0.110       | 100               | 93        | 85         | 72         | 64         | 47         | 32          | 23          |
|                       | STDEV       | 0.01        | 0.02      | 0.02       | 0.01       | 0.02       | 0.01       | 0.03        | 0.02        | 0                 | 5         | 5          | 3          | 5          | 3          | 5           | 5           |
| sh-BCYRN1 + NC        | Replicate 1 | 0.502       | 0.466     | 0.416      | 0.353      | 0.294      | 0.234      | 0.165       | 0.103       | 100               | 93        | 83         | 70         | 59         | 47         | 33          | 21          |
|                       | Replicate 2 | 0.488       | 0.454     | 0.432      | 0.357      | 0.323      | 0.214      | 0.141       | 0.127       | 100               | 93        | 89         | 73         | 66         | 44         | 29          | 26          |
|                       | Replicate 3 | 0.444       | 0.428     | 0.358      | 0.308      | 0.285      | 0.211      | 0.139       | 0.126       | 100               | 96        | 81         | 69         | 64         | 48         | 31          | 28          |
|                       | AVERAGE     | 0.478       | 0.449     | 0.402      | 0.339      | 0.301      | 0.220      | 0.148       | 0.119       | 100               | 94        | 84         | 71         | 63         | 46         | 31          | 25          |
|                       | STDEV       | 0.03        | 0.02      | 0.04       | 0.03       | 0.02       | 0.01       | 0.01        | 0.01        | 0                 | 2         | 4          | 2          | 4          | 2          | 4           | 4           |
| sh-BCYRN1 + inhibitor | Replicate 1 | 0.502       | 0.460     | 0.450      | 0.425      | 0.339      | 0.272      | 0.188       | 0.157       | 100               | 92        | 90         | 85         | 68         | 54         | 37          | 31          |
|                       | Replicate 2 | 0.488       | 0.484     | 0.402      | 0.377      | 0.362      | 0.243      | 0.218       | 0.194       | 100               | 99        | 82         | 77         | 74         | 50         | 45          | 40          |
|                       | Replicate 3 | 0.444       | 0.432     | 0.409      | 0.347      | 0.343      | 0.257      | 0.155       | 0.125       | 100               | 97        | 92         | 78         | 77         | 58         | 35          | 28          |
|                       | AVERAGE     | 0.478       | 0.439     | 0.420      | 0.383      | 0.348      | 0.257      | 0.187       | 0.139       | 100               | 96        | 88         | 80         | 73         | 54         | 39          | 33          |
|                       | STDEV       | 0.03        | 0.03      | 0.03       | 0.04       | 0.01       | 0.01       | 0.03        | 0.03        | 0                 | 4         | 5          | 4          | 5          | 4          | 5           | 6           |

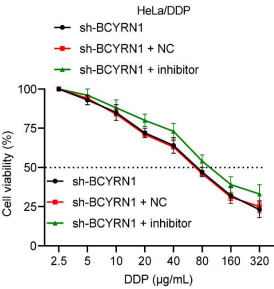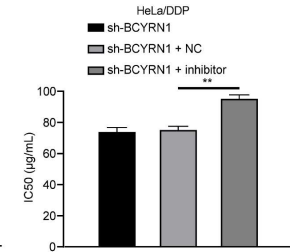

| Sample      | sh-BCYRN1 | sh-BCYRN1 + NC | sh-BCYRN1 + inhibitor |
|-------------|-----------|----------------|-----------------------|
| Replicate 1 | 72.41     | 73.01          | 93.10                 |
| Replicate 2 | 77.13     | 76.36          | 97.71                 |
| Replicate 3 | 73.15     | 76.92          | 95.66                 |
| AVERAGE     | 74.23     | 75.43          | 95.49                 |
| STDEV       | 2.54      | 2.11           | 2.31                  |

| Sample      | sh-BCYRN1 | sh-BCYRN1 + NC | sh-BCYRN1 + inhibitor |
|-------------|-----------|----------------|-----------------------|
| Replicate 1 | 129       | 122            | 167                   |
| Replicate 2 | 125       | 124            | 164                   |
| Replicate 3 | 123       | 127            | 165                   |
| AVERAGE     | 125.67    | 124.33         | 165.33                |
| STDEV       | 3.06      | 2.52           | 1.53                  |

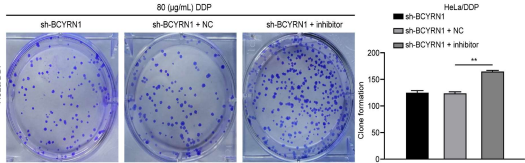

Fig. 5

Fig. 5. HMGB3 overexpression debilitates the suppressive function of BCYRN1 knockdown to DDP-resistance of CC cells.

pcDNA-HMGB3 was transfected into HeLa/DDP cells with silenced BCYRN1, with pcDNA-NC as NC. A, pcDNA-HMGB3 transfection efficiency in CC cells determined by RT-qPCR.

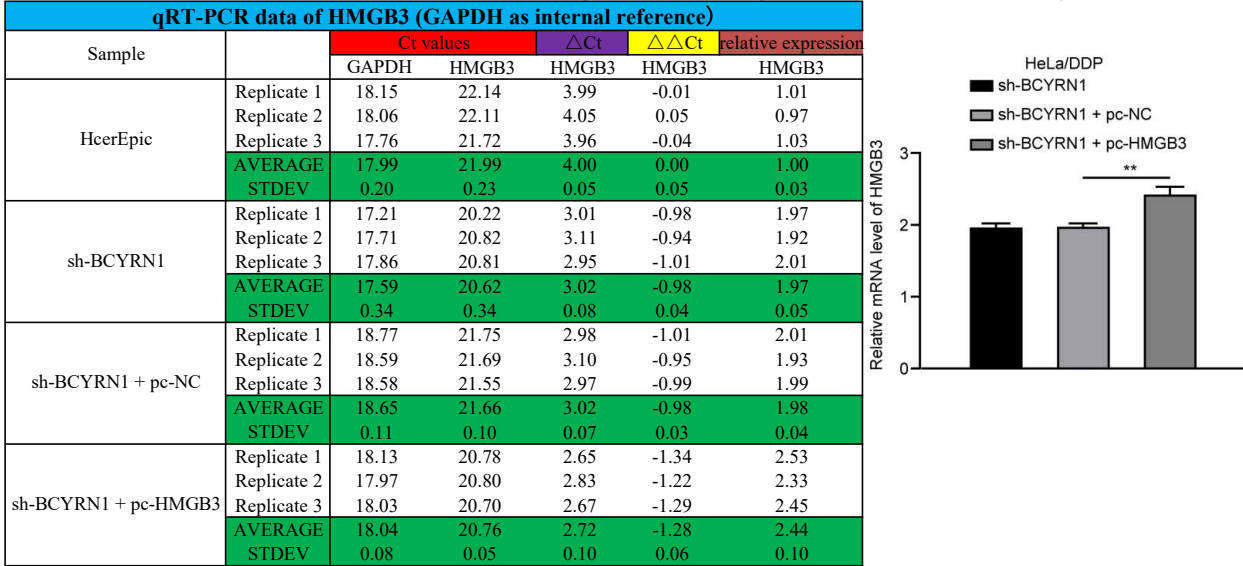

pcDNA-HMGB3 was transfected into HeLa/DDP cells with silenced BCYRN1, with pcDNA-NC as NC. B and C, cell resistance assessed via MTT (B) assay and colony formation assay (C).

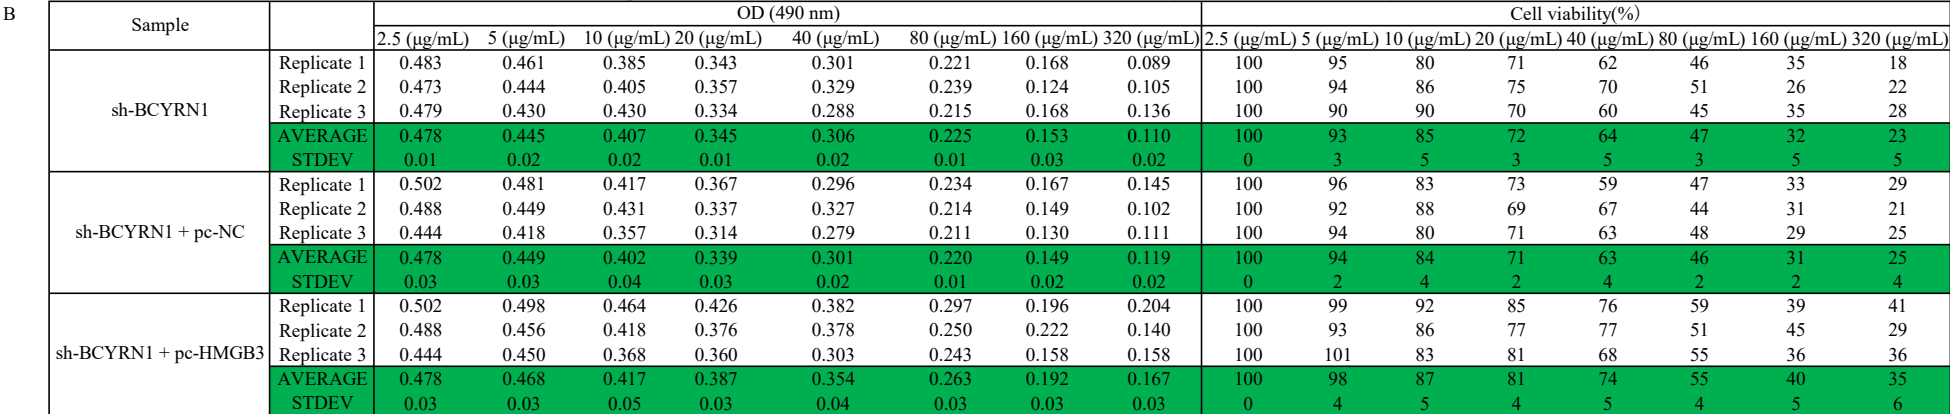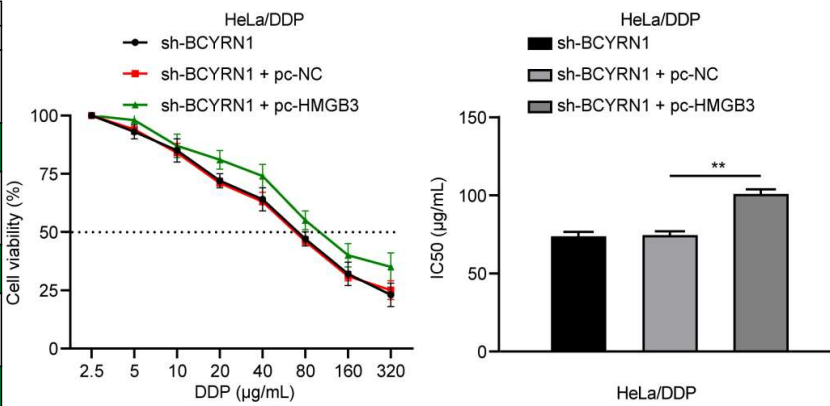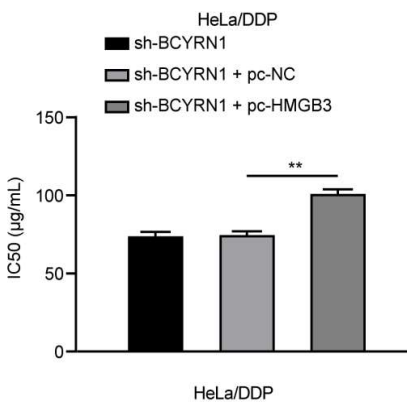

| Sample      | sh-BCYRN1 | sh-BCYRN1 + pc-NC | sh-BCYRN1 + pc-HMGB3 |
|-------------|-----------|-------------------|----------------------|
| Replicate 1 | 72.41     | 72.79             | 103.29               |
| Replicate 2 | 77.13     | 77.07             | 102.31               |
| Replicate 3 | 73.15     | 75.08             | 98.48                |
| AVERAGE     | 74.23     | 74.98             | 101.36               |
| STDEV       | 2.54      | 2.14              | 2.54                 |

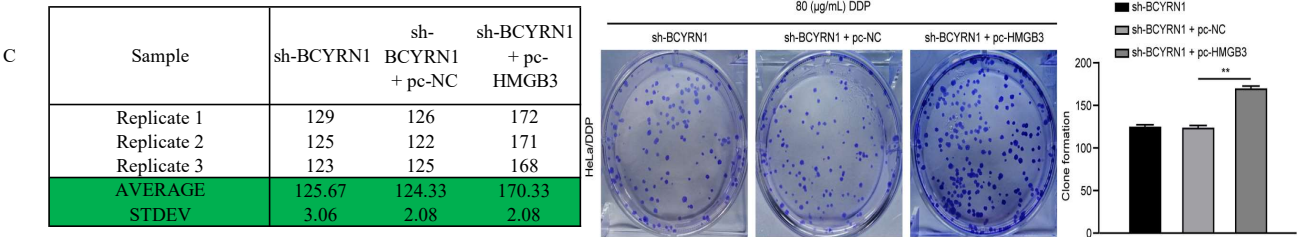

Fig. 6. BCYRN1 knockdown suppresses DDP-resistance of CC cells in vivo.

A, tumor volume in transplanted tumor model.

| Sample    |             | 7 (days) | 10 (days) | 13 (days) | 16 (days) | 19 (days) | 22 (days) | 25 (days) | 28 (days) |
|-----------|-------------|----------|-----------|-----------|-----------|-----------|-----------|-----------|-----------|
| HeLa/DDP  | Replicate 1 | 91.98    | 102.30    | 208.40    | 257.49    | 373.78    | 468.51    | 647.42    | 638.39    |
|           | Replicate 2 | 98.82    | 143.05    | 247.23    | 268.50    | 345.28    | 499.19    | 603.99    | 861.54    |
|           | Replicate 3 | 104.36   | 119.28    | 227.79    | 273.47    | 330.98    | 502.95    | 575.25    | 812.96    |
|           | Replicate 4 | 100.06   | 127.10    | 207.09    | 277.70    | 413.16    | 534.54    | 658.67    | 747.89    |
|           | Replicate 5 | 116.99   | 121.92    | 186.90    | 226.41    | 354.65    | 538.51    | 738.70    | 802.81    |
|           | Replicate 6 | 87.80    | 126.88    | 228.43    | 301.67    | 387.39    | 568.20    | 637.15    | 728.98    |
|           | AVERAGE     | 100.00   | 123.42    | 217.64    | 267.54    | 367.54    | 518.65    | 643.53    | 765.43    |
|           | STDEV       | 10.22    | 13.24     | 21.15     | 24.89     | 30.04     | 35.33     | 55.80     | 78.32     |
| sh-NC     | Replicate 1 | 103.63   | 108.27    | 163.55    | 248.88    | 346.06    | 439.33    | 565.95    | 774.27    |
|           | Replicate 2 | 103.82   | 118.27    | 235.33    | 313.76    | 360.46    | 425.29    | 605.40    | 723.84    |
|           | Replicate 3 | 107.08   | 126.37    | 193.45    | 281.28    | 366.95    | 544.42    | 610.23    | 690.47    |
|           | Replicate 4 | 115.06   | 120.09    | 207.23    | 246.69    | 372.48    | 512.91    | 650.85    | 787.33    |
|           | Replicate 5 | 73.94    | 144.83    | 198.10    | 212.95    | 305.44    | 539.97    | 655.96    | 880.25    |
|           | Replicate 6 | 77.03    | 102.16    | 206.84    | 282.34    | 403.81    | 538.08    | 694.13    | 762.34    |
|           | AVERAGE     | 96.76    | 120.00    | 200.75    | 264.32    | 359.20    | 500.00    | 630.42    | 769.75    |
|           | STDEV       | 17.02    | 14.94     | 23.32     | 35.34     | 32.53     | 53.76     | 45.43     | 64.79     |
| sh-BCYRN1 | Replicate 1 | 99.00    | 137.29    | 112.36    | 129.07    | 222.61    | 302.90    | 284.63    | 293.60    |
|           | Replicate 2 | 87.82    | 121.86    | 129.37    | 268.66    | 321.55    | 313.27    | 272.54    | 481.45    |
|           | Replicate 3 | 80.43    | 125.44    | 143.16    | 187.23    | 272.01    | 261.52    | 375.12    | 440.55    |
|           | Replicate 4 | 101.90   | 79.53     | 132.47    | 214.02    | 219.27    | 237.95    | 347.99    | 385.78    |
|           | Replicate 5 | 122.49   | 86.28     | 174.57    | 196.27    | 167.82    | 295.33    | 371.29    | 432.01    |
|           | Replicate 6 | 96.36    | 128.87    | 101.97    | 213.27    | 273.63    | 326.86    | 369.66    | 369.85    |
|           | AVERAGE     | 98.00    | 113.21    | 132.32    | 201.42    | 246.15    | 289.64    | 336.87    | 400.54    |
|           | STDEV       | 14.36    | 24.12     | 25.42     | 45.35     | 53.89     | 33.51     | 46.29     | 65.93     |

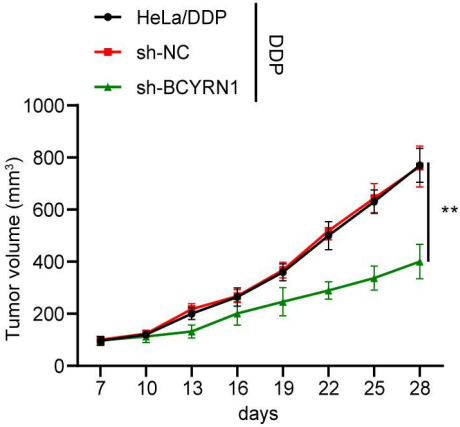

B, representative images and weights of tumors.

| Sample      | HeLa/DDP | sh-NC | sh-BCYRN1 |
|-------------|----------|-------|-----------|
| Replicate 1 | 0.75     | 0.90  | 0.39      |
| Replicate 2 | 0.91     | 0.93  | 0.45      |
| Replicate 3 | 0.86     | 0.82  | 0.50      |
| Replicate 4 | 1.04     | 0.66  | 0.46      |
| Replicate 5 | 0.80     | 0.78  | 0.61      |
| Replicate 6 | 0.86     | 0.89  | 0.35      |
| AVERAGE     | 0.87     | 0.83  | 0.46      |
| STDEV       | 0.10     | 0.10  | 0.09      |

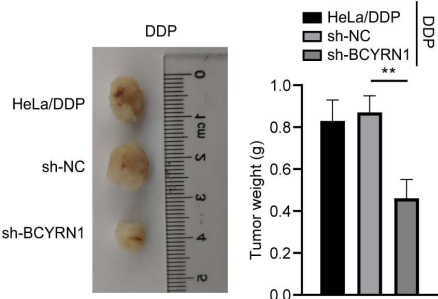

C, D and E, expression of BCYRN1 (C) , miR-330-5p (D) and HMGB3 (E) mRNA detected by RT-qPCR.

C

| qRT-PCR data of BCYRN1 (GAPDH as internal reference) |             |           |        |        |        |                     |
|------------------------------------------------------|-------------|-----------|--------|--------|--------|---------------------|
| Sample                                               |             | Ct values |        | △Ct    | △△Ct   | relative expression |
|                                                      |             | GAPDH     | BCYRN1 | BCYRN1 | BCYRN1 | BCYRN1              |
| HeLa/DDP                                             | Replicate 1 | 17.12     | 21.34  | 4.22   | 0.10   | 0.93                |
|                                                      | Replicate 2 | 18.43     | 22.56  | 4.13   | 0.01   | 0.99                |
|                                                      | Replicate 3 | 17.43     | 21.43  | 4.00   | -0.12  | 1.09                |
|                                                      | Replicate 4 | 18.23     | 22.21  | 3.98   | -0.14  | 1.10                |
|                                                      | Replicate 5 | 17.54     | 21.68  | 4.14   | 0.02   | 0.99                |
|                                                      | Replicate 6 | 18.54     | 22.78  | 4.24   | 0.12   | 0.92                |
|                                                      | AVERAGE     | 17.88     | 22.00  | 4.12   | 0.00   | 1.00                |
|                                                      | STDEV       | 0.59      | 0.60   | 0.11   | 0.11   | 0.08                |
| sh-NC                                                | Replicate 1 | 18.43     | 22.54  | 4.11   | -0.11  | 1.08                |
|                                                      | Replicate 2 | 17.65     | 21.89  | 4.24   | 0.11   | 0.93                |
|                                                      | Replicate 3 | 18.65     | 22.65  | 4.00   | 0.00   | 1.00                |
|                                                      | Replicate 4 | 17.87     | 21.78  | 3.91   | -0.07  | 1.05                |
|                                                      | Replicate 5 | 18.43     | 22.61  | 4.18   | 0.04   | 0.97                |
|                                                      | Replicate 6 | 18.54     | 22.43  | 3.89   | -0.35  | 1.27                |
|                                                      | AVERAGE     | 18.26     | 22.32  | 4.06   | -0.06  | 1.05                |
|                                                      | STDEV       | 0.40      | 0.38   | 0.14   | 0.16   | 0.12                |
| sh-BCYRN1                                            | Replicate 1 | 17.44     | 22.44  | 5.00   | 0.78   | 0.58                |
|                                                      | Replicate 2 | 18.40     | 24.23  | 5.83   | 1.70   | 0.31                |
|                                                      | Replicate 3 | 17.43     | 22.53  | 5.10   | 1.10   | 0.47                |
|                                                      | Replicate 4 | 18.22     | 23.36  | 5.14   | 1.16   | 0.45                |
|                                                      | Replicate 5 | 17.44     | 23.16  | 5.72   | 1.58   | 0.33                |
|                                                      | Replicate 6 | 18.54     | 23.79  | 5.25   | 1.01   | 0.50                |
|                                                      | AVERAGE     | 17.91     | 23.25  | 5.34   | 1.22   | 0.44                |
|                                                      | STDEV       | 0.53      | 0.70   | 0.35   | 0.35   | 0.10                |

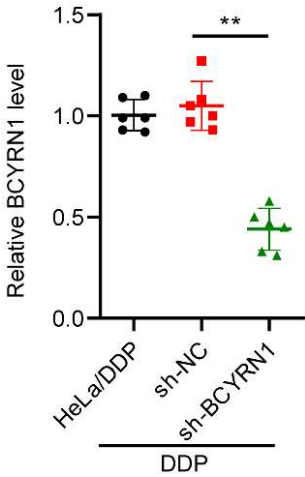

D

| qRT-PCR data of miR-330-5p (U6 as internal reference) |             |           |            |             |                   |                     |
|-------------------------------------------------------|-------------|-----------|------------|-------------|-------------------|---------------------|
| Sample                                                |             | Ct values |            | $\Delta$ Ct | $\Delta\Delta$ Ct | relative expression |
|                                                       |             | U6        | miR-330-5p | miR-330-5p  | miR-330-5p        | miR-330-5p          |
| HeLa/DDP                                              | Replicate 1 | 14.43     | 22.54      | 8.11        | -0.09             | 1.06                |
|                                                       | Replicate 2 | 13.54     | 21.78      | 8.24        | 0.04              | 0.97                |
|                                                       | Replicate 3 | 13.54     | 21.89      | 8.35        | 0.15              | 0.90                |
|                                                       | Replicate 4 | 14.42     | 22.54      | 8.12        | -0.08             | 1.06                |
|                                                       | Replicate 5 | 13.64     | 21.99      | 8.35        | 0.15              | 0.90                |
|                                                       | Replicate 6 | 14.40     | 22.43      | 8.03        | -0.17             | 1.13                |
|                                                       | AVERAGE     | 14.00     | 22.20      | 8.20        | 0.00              | 1.00                |
|                                                       | STDEV       | 0.46      | 0.35       | 0.13        | 0.13              | 0.09                |
| sh-NC                                                 | Replicate 1 | 14.54     | 22.56      | 8.02        | -0.09             | 1.06                |
|                                                       | Replicate 2 | 14.42     | 22.76      | 8.34        | 0.10              | 0.93                |
|                                                       | Replicate 3 | 13.42     | 21.79      | 8.37        | 0.02              | 0.99                |
|                                                       | Replicate 4 | 13.60     | 21.78      | 8.18        | 0.06              | 0.96                |
|                                                       | Replicate 5 | 14.65     | 22.88      | 8.23        | -0.12             | 1.09                |
|                                                       | Replicate 6 | 14.45     | 22.50      | 8.05        | 0.02              | 0.99                |
|                                                       | AVERAGE     | 14.18     | 22.38      | 8.20        | 0.00              | 1.00                |
|                                                       | STDEV       | 0.53      | 0.48       | 0.14        | 0.09              | 0.06                |
| sh-BCYRN1                                             | Replicate 1 | 14.60     | 22.20      | 7.60        | -0.51             | 1.42                |
|                                                       | Replicate 2 | 14.42     | 22.09      | 7.67        | -0.57             | 1.48                |
|                                                       | Replicate 3 | 13.42     | 21.33      | 7.91        | -0.44             | 1.36                |
|                                                       | Replicate 4 | 13.52     | 20.76      | 7.24        | -0.88             | 1.84                |
|                                                       | Replicate 5 | 14.52     | 22.34      | 7.82        | -0.53             | 1.44                |
|                                                       | Replicate 6 | 14.64     | 21.92      | 7.28        | -0.75             | 1.68                |
|                                                       | AVERAGE     | 14.19     | 21.77      | 7.59        | -0.61             | 1.54                |
|                                                       | STDEV       | 0.56      | 0.61       | 0.28        | 0.17              | 0.18                |

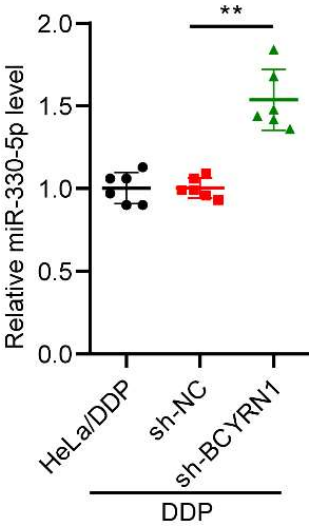

E

| qRT-PCR data of HMGB3 (GAPDH as internal reference) |             |           |       |             |                   |                     |
|-----------------------------------------------------|-------------|-----------|-------|-------------|-------------------|---------------------|
| Sample                                              |             | Ct values |       | $\Delta$ Ct | $\Delta\Delta$ Ct | relative expression |
|                                                     |             | GAPDH     | HMGB3 | HMGB3       | HMGB3             | HMGB3               |
| HeLa/DDP                                            | Replicate 1 | 18.40     | 22.54 | 4.14        | -0.07             | 1.05                |
|                                                     | Replicate 2 | 17.54     | 22.00 | 4.46        | 0.25              | 0.84                |
|                                                     | Replicate 3 | 17.54     | 21.78 | 4.24        | 0.03              | 0.98                |
|                                                     | Replicate 4 | 18.21     | 22.32 | 4.11        | -0.10             | 1.07                |
|                                                     | Replicate 5 | 18.11     | 22.31 | 4.20        | -0.01             | 1.01                |
|                                                     | Replicate 6 | 17.42     | 21.54 | 4.12        | -0.09             | 1.07                |
|                                                     | AVERAGE     | 17.87     | 22.08 | 4.21        | 0.00              | 1.00                |
|                                                     | STDEV       | 0.42      | 0.38  | 0.13        | 0.13              | 0.09                |
| sh-NC                                               | Replicate 1 | 18.42     | 22.42 | 4.00        | -0.14             | 1.10                |
|                                                     | Replicate 2 | 17.42     | 21.98 | 4.56        | 0.10              | 0.93                |
|                                                     | Replicate 3 | 18.42     | 22.69 | 4.27        | 0.03              | 0.98                |
|                                                     | Replicate 4 | 17.54     | 21.69 | 4.15        | 0.04              | 0.97                |
|                                                     | Replicate 5 | 18.11     | 22.60 | 4.49        | 0.29              | 0.82                |
|                                                     | Replicate 6 | 17.54     | 21.69 | 4.15        | 0.03              | 0.98                |
|                                                     | AVERAGE     | 17.91     | 22.18 | 4.27        | 0.06              | 0.96                |
|                                                     | STDEV       | 0.46      | 0.45  | 0.22        | 0.14              | 0.09                |
| sh-BCYRN1                                           | Replicate 1 | 18.54     | 23.44 | 4.90        | 0.76              | 0.59                |
|                                                     | Replicate 2 | 18.21     | 23.76 | 5.55        | 1.09              | 0.47                |
|                                                     | Replicate 3 | 17.54     | 22.90 | 5.36        | 1.12              | 0.46                |
|                                                     | Replicate 4 | 17.65     | 22.59 | 4.94        | 0.83              | 0.56                |
|                                                     | Replicate 5 | 18.33     | 23.49 | 5.16        | 0.96              | 0.51                |
|                                                     | Replicate 6 | 18.42     | 22.89 | 4.47        | 0.35              | 0.78                |
|                                                     | AVERAGE     | 18.12     | 23.18 | 5.06        | 0.85              | 0.56                |
|                                                     | STDEV       | 0.42      | 0.45  | 0.38        | 0.28              | 0.12                |

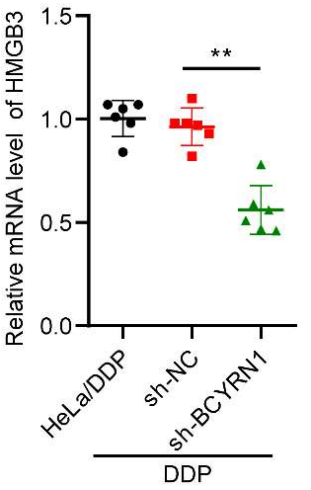

Supplement: Supplementary file 1 [file 1]
